# Supplementary material for: Discrimination between thermodynamic models of cis-regulation using transcription factor occupancy data
Source: PubMed Central journal article supplement (PMC3936720; doi:10.1093/nar/gkt1230), 2013-11-27
Supplement: supp_gkt1230_nar-01662-m-2013-File005.pdf [file supp_gkt1230_nar-01662-m-2013-File005.pdf]

## Supplemental Methods

### Library Sequencing

Synthetic promoters were sequenced on the Illumina MiSeq platform using a double barcoding strategy. One of 96-well-specific barcoded primers was used with one of forty plate-specific barcoded primers to colony PCR the synthetic promoters such that each promoter was amplified with a unique combination of well and plate primers (well and plate primers are listed in supplementary table S1). The well primers included a *Sall* restriction site and the plate primers included an *Mfe*I restriction site at the 3' end. Five  $\mu$ L of each PCR reaction was pooled together and ethanol precipitated, resuspended in 10 mLs of water, phenol/chloroform extracted, then ethanol precipitated and resuspended in 1 mL of H<sub>2</sub>O. The DNA was size-selected (150bp to 800bp) on a 1.5% TAE gel and purified, then ligated to annealed oligos RZ231 and RZ233 in the presence of *Eco*R1-HF (NEB R3101) and *Mfe*I (NEB R0589S) and purified. The purified material was then ligated to annealed oligos RZ230 and RZ232 in the presence of *Xho*I (NEB R0146S) and *Sal*I-HF (NEB R3138), then size selected (150-700 bp) on a 1.5% TAE Agarose gel. The library was then sequenced on the MiSeq platform using 250 cycles for read one and 50 cycles for read two. The resulting sequence data was analyzed by custom python scripts that using a minimum hamming distance approach to determine the TFBS composition of the promoters and the originating well and plate of the promoter.

### Biotin-ChIP

One liter of pooled culture growth was incubated with 1% final concentration of formaldehyde for 15 minutes at room temperature, followed by addition of 150 mLs of 2.5M glycine for five minutes. The cultures were centrifuged, then washed three times with chilled TBS. The cell pellet was frozen at least overnight at -80C. Frozen pellets were thawed on ice and resuspended in 2 mLs of Lysis Buffer (50 mM HEPES, 150 mM NaCl, 1 mM EDTA, 1% v/v Triton X-100, 0.1% w/v sodium deoxycholate, 0.1% w/v SDS) and protease inhibitor (Roche #11836170001). Each replicate bead beat using zirconium silicate beads using a Biospec Products Mini Bead Beater six times for three minutes each time with a minute in ice-water between beatings. The lysed material was extracted by centrifugation and the pellets resuspended in a final volume of 5 mLs of Lysis Buffer in a 15 mL centrifuge tube. The resuspended material was sonicated twice for 30 seconds with a Branson Sonifier 250 tip sonicator at power level six, duty 75% followed by four times for 30 seconds at power level five, duty 75%, with at least two minutes on ice between sonications. The supernatant was clarified by centrifugation, then applied to 500  $\mu$ L PBS-washed Dynal M280 streptavidin-coated magnetic beads (Life Technologies, 112-05D) and incubated at room temperature for one hour. The beads were bound to magnets and the supernatant removed and set aside as "input" (IN) material. The beads were washed twice for five minutes per wash in each of Lysis Buffer, High Salt Lysis Buffer (50 mM HEPES, 0.5M NaCl, 1 mM EDTA, 1% v/v Triton X-100, 0.1% w/v sodium deoxycholate), LiCl Wash Buffer (500 mM LiCl, 1% NP-40 alternative, 10 mM Tris pH 8.0, 1 mM EDTA), SDS Wash Buffer (10 mM Tris pH 8.0, 1 mM EDTA, 3% SDS), and TE (10 mM Tris pH 8.0, 1 mM EDTA). The beads were resuspended in 250  $\mu$ L TE + 0.5% SDS + 10  $\mu$ L of 20 mg/mL Proteinase-K (NEB P8102S) and distributed into three 250  $\mu$ L PCR tubes per replicate. Then 72.5  $\mu$ L of IN material was

combined with 72.5 uL of TE + 1% SDS to which 10 uL of 20 mg/mL Proteinase-K was added and distributed into three 250 uL PCR tubes per replicate. The tubes were incubated for four hours at 42C, two hours at 72C, and six hours at 65C. The material from each replicate was recombined and purified via ChIP cleanup columns (Zymo D5205), eluting in 40 uL of elution buffer.

### Thermodynamic Model of Transcription

Modeling of expression and occupancy used the thermodynamic model of transcription described previously (28,34,35). The model considers unbound DNA as a reference state and computes the statistical weight of each possible configuration  $k$  of transcription factors and proteins bound to the DNA as:

$$W_k = e^{-\Delta G_k}$$

Where  $\Delta G_k$  is given as:

$$\Delta G_k = \sum_{i=1}^L (\Delta G_{tf_i DNA} + \Delta G_{tf_i, RNAP} \cdot \delta(RNAP)) \cdot \delta(TF_i) + \sum_{i=1}^{L-1} \sum_{j=i+1}^L \Delta G_{ixn\ tf_i, j} \cdot \delta(TF_i) \cdot \delta(TF_j) \cdot \varepsilon(i, j)$$

where  $L$  is the number of TF binding sites in the synthetic promoter,  $\Delta G_{tf_i DNA}$  is the binding energy of the TF at site  $i$ , reflecting its concentration and affinity for the site,  $\Delta G_{tf_i RNAP}$  is the binding energy between the TF at site  $i$  and RNAP,  $\delta(RNAP)$  is one if RNAP is bound in the current state and zero otherwise,  $\Delta G_{ixn\ tf_i, j}$  is the binding energy between the TF at site  $i$  and the TF at site  $j$ ,  $\delta(TF_x)$  is one if the TF at site  $x$  is bound in the current state and zero otherwise, and  $\varepsilon(i, j)$  is one if there are no other TFs bound between sites  $i$  and  $j$  in the current state, and zero otherwise. The probability of polymerase bound is then given as:

$$P(RNAP_{bound}) = \frac{\sum_{k=1}^N W_k \delta_k(RNAP)}{\sum_{k=1}^N W_k}$$

Where  $N$  is the total number of states ( $2^L$  for non-competitive binding), and  $\delta_k(RNAP)$  is one if RNAP is bound in state  $k$  and zero otherwise. The probability of occupancy for a particular TF is computed as:

$$P(\geq 1 TF_{bound}) = \frac{\sum_{k=1}^N W_k \delta_k(TF)}{\sum_{k=1}^N W_k}$$

Where N is the total number of states ( $2^L$  for non-competitive binding), and  $\delta_k(TF)$  is one if the TF is bound to one or more of its sites in the state and zero otherwise. The observed occupancy and expression values were assumed to be linearly related to the predicted probabilities, respectively:

$$Occupancy = \alpha \cdot P(\geq 1 TF_{bound})$$

And

$$Expression = \beta \cdot P(RNAP_{bound})$$

Where  $\alpha$  and  $\beta$  are the least-squares estimates. The current model does not account for non-specific TF-DNA interactions and always predicts an occupancy of zero for promoters with no specific binding site for the factor of interest. Therefore, promoters lacking a specific binding site for the factor whose occupancy was being calculated were excluded from model estimation and validation. Model parameters were recovered in several ways. First, by performing simultaneous optimization with only expression data. Second by fitting with occupancy data. Third, by fitting to occupancy and expression data. When fitting only to occupancy data, TF-DNA and TF-TF binding energies were explored with a simultaneous fit to all environments. When fitting to expression data, the optimization was carried out simultaneously for multiple environments and factors largely as previously described (35) with modifications as follows. First, expression values for multiple biological replicates within a particular strain background were collapsed into a single promoter using the median expression of all biological replicates. Second, no down-weighting of short-promoter residuals was used. Finally, the optimization was done in R using `nlm` with default parameters. When fitting with both expression and occupancy data, the occupancy data was first re-scaled by the ratio of the means of the occupancy and expression data to put it on a similar quantitative scale to the expression data to ensure that neither the occupancy nor the expression would dominate the residual sum of squares for fitting. Optimization was performed as for fitting with expression data, with the probability of both occupancy and expression scaled to the mean of all observed values.

### qPCR of ChIP Samples

Factor-specific qPCR primers were chosen by selecting the most highly enriched probes for the factor from Harbison, *et al.* (61), scanning the probe sequence with Patser (62) for motif matches using motifs from Zhao and Stormo (63) for Cbf1 and from Spivak and Stormo (64) for the remaining factors, then using Primer3 to design qPCR primers that flanked the best motif matches. SUC2 was used as an internal control region. Briefly, qPCR was carried out using three independent dilutions of two ChIP

replicates for both IP and IN samples (0.004 - 0.04 ng/uL final concentration) using SYBR Green QPCR Master Mix (Thermo Scientific AB-1158/A) for detection in a final volume of 25 uL, with qPCR primers (table 3.6) at a final concentration of 0.3uM. The qPCR was run on a Stratagene Mx3000p thermocycler. Replicates were averaged and analyzed using the  $\Delta\Delta C_t$  method.

**Figure S1: Expression distributions in glucose similar across all libraries except Cbf1**

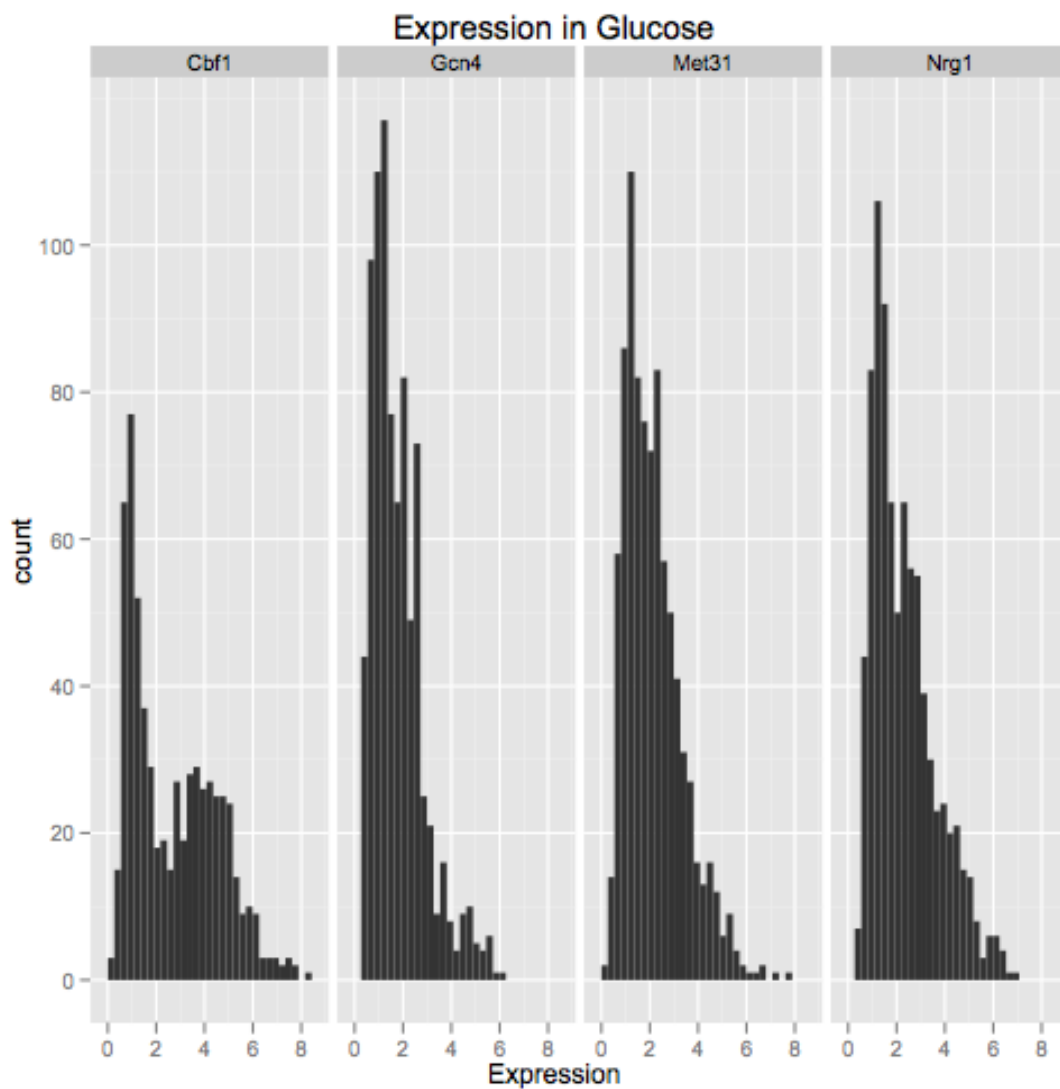

Libraries were grown to mid-log phase in SCB-Ura, fixed with a final concentration of 1% formaldehyde, and the fluorescence intensities measured by flow cytometry. The distribution of all libraries is similar except for Cbf1 (after multiple hypothesis correction,  $P < 10^{-16}$  for Cbf1-Gcn4, Cbf1-Met31, Cbf1-Nrg1;  $P=0.18$ , Gcn4-Met31;  $P=0.06$ , Gcn4-Nrg1;  $P=0.45$ , Met31-Nrg1, Kolmogorov-Smirnov test).

Figure S2: Expression distributions in AAS similar across all libraries

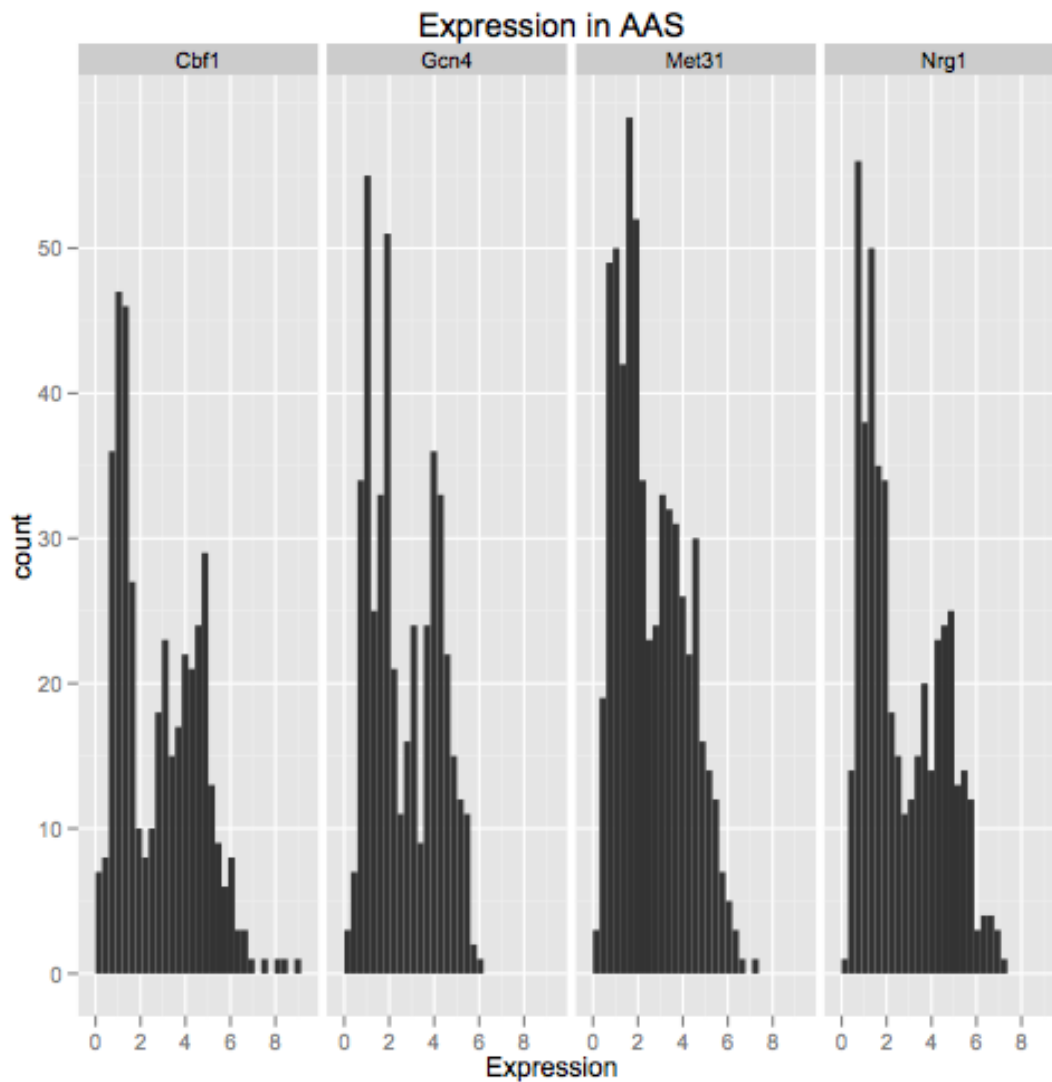

Libraries were grown to mid-log phase in SCB-Ura, fixed with a final concentration of 1% formaldehyde, and the fluorescence intensities measured by flow cytometry. The distribution of all libraries is similar but with some significant differences by Kolmogorov-Smirnov testing, suggesting some strain-specific effects in AAS, probably due to the protein tag (after multiple hypothesis correction,  $P = 0.0096$ , Cbf1-Gcn4;  $P=0.20$ , Cbf1-Met31;  $P=0.00017$ , Cbf1-Nrg1;  $P=0.41$  Gcn4-Met31;  $P=6.3e^{-10}$ , Gcn4-Nrg1;  $P=1.3e^{-5}$  Met31-Nrg1).

Figure S3: Avi-tagging increases Cbf1 activation potential, but not Gcn4

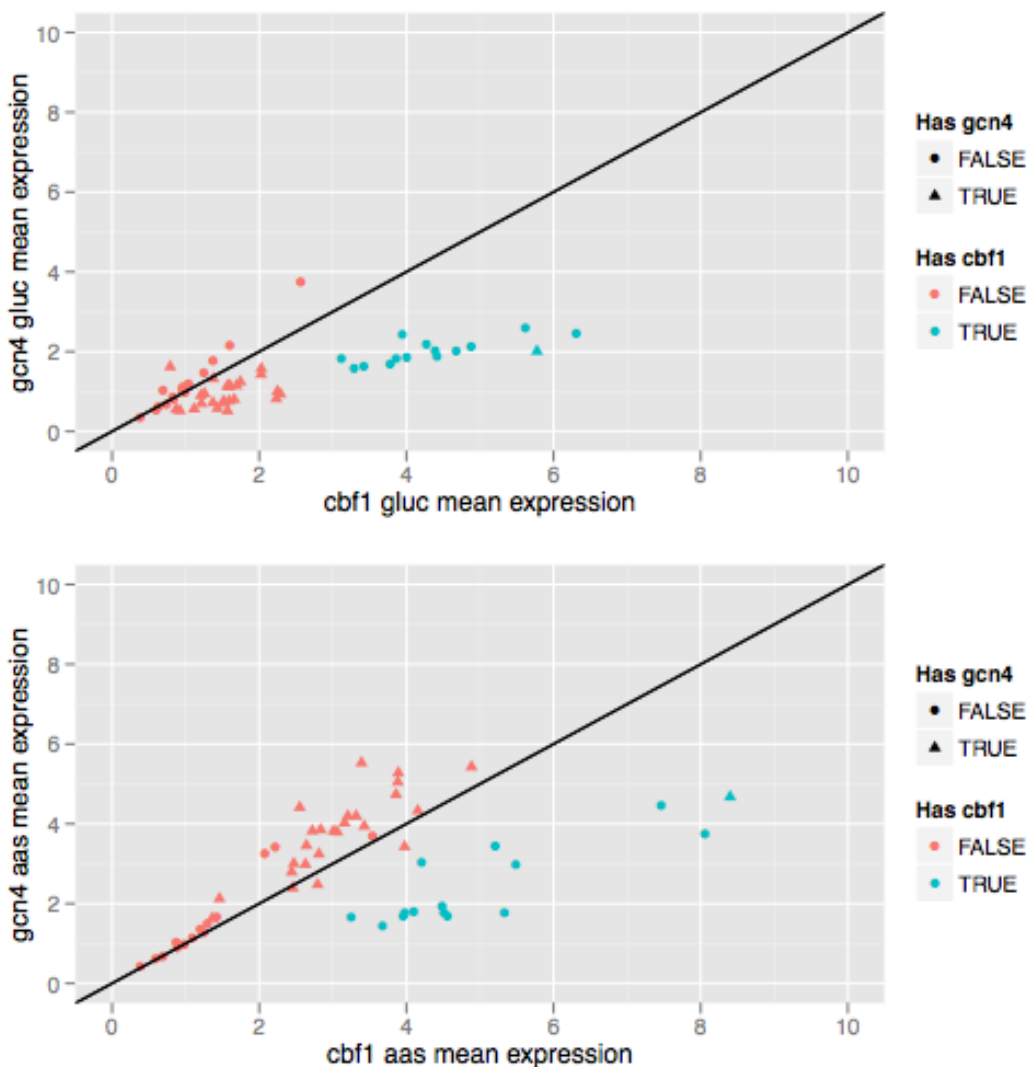

Mean expression of identical promoters in the Cbf1-tagged background and Gcn4-tagged background were compared. Promoters without cbf1 in them (red) generally show good agreement between the two libraries, falling along the black line. Promoters with Cbf1 sites in them (blue) consistently show higher expression in the Cbf1-tagged background than in the Gcn4-tagged background. Promoters with Gcn4 sites in them (triangles) do not appear to differ between the two libraries, indicating that the tag on Gcn4 has little if any effect on expression.

**Figure S4: Specific enrichment of bound regions for Cbf1 and Gcn4 in glucose and AAS**

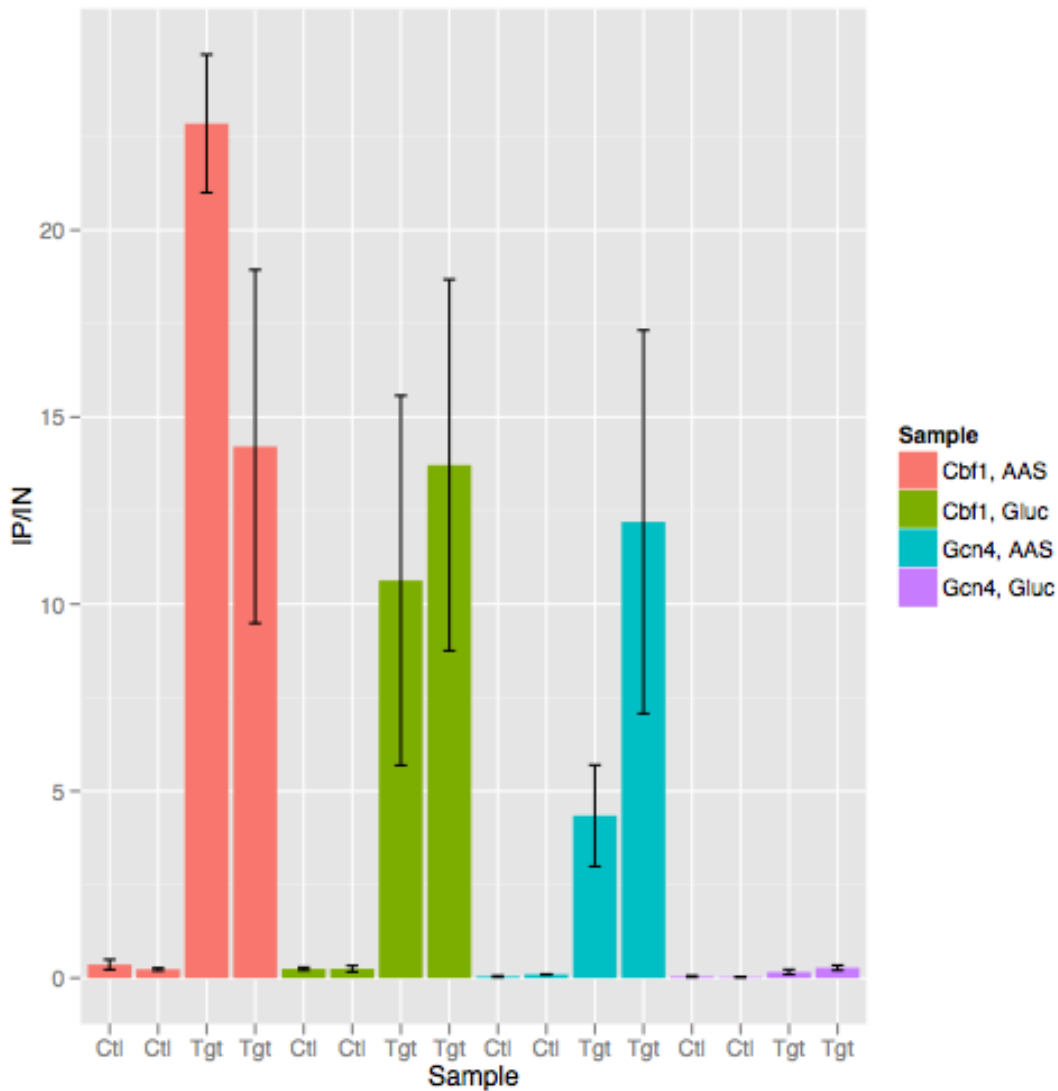

ChIP was performed on synthetic promoter-bearing strains with Avi-tagged Cbf1 and avi-tagged Gcn4 as outlined in methods. Enrichment was gauged by qPCR of a control (Ctl) region (SUC2) versus a target (Tgt) region (Ade 3 for Cbf1, CPA2 for Gcn4). Gluc is in Glucose, AAS is in Amino Acid Starvation. The target region is differentially bound with respect to the control region for both factors in all conditions, though only marginally so for Gcn4 in Glucose. The low enrichment of Gcn4 in Glucose is expected due to low functional expression of Gcn4 in that condition, based on Western Blotting (not shown) and previous literature [REF].



**Figure S5: Limited or no specific enrichment of Met31 and Nrg1 ChIP**

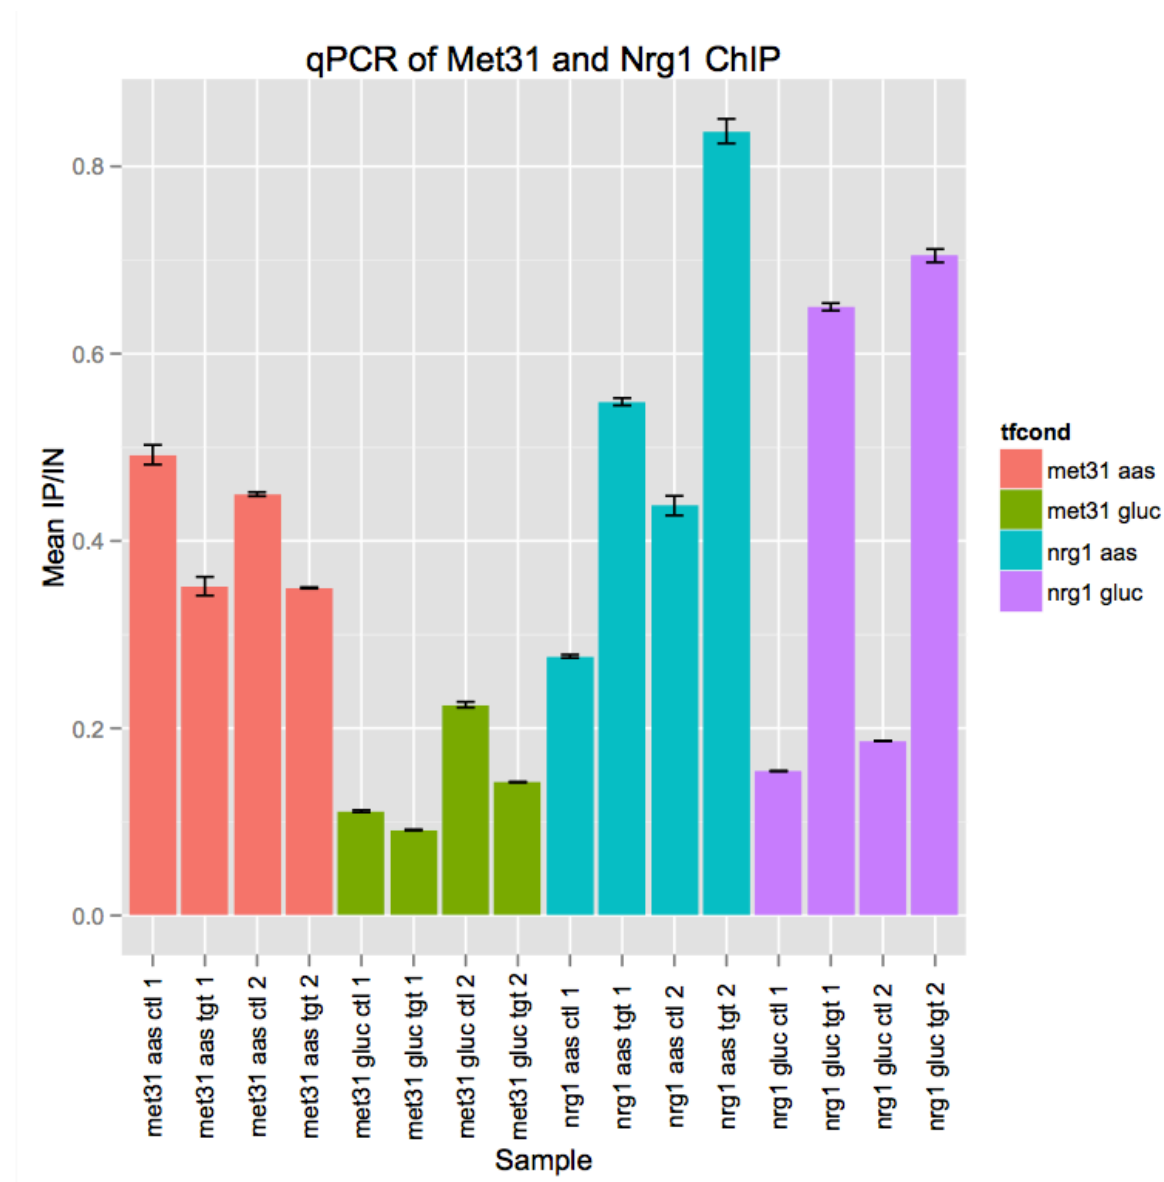

ChIP was performed on synthetic promoter-bearing strains with Avi-tagged Met31 and avi-tagged Nrg1 as outlined in methods. Enrichment was gauged by qPCR of a control (Ctl) region (SUC2) versus a target (Tgt) region (CAF120 for Met31, NRG1 for Nrg1). Gluc is in Glucose, AAS is in Amino Acid Starvation. The target region is not differentially bound with respect to the control region for Met31. Although Nrg1 looks significantly enriched, the level of enrichment is similar to levels obtained from ChIP done in strains with only BirA (data not shown).

**Table S1: Barcoded “well” and “plate” PCR primers used for library sequencing.**

| Sequence                                | Barcode | Use                                      |
|-----------------------------------------|---------|------------------------------------------|
| CTACGTCGACACACACTTAATCGTTCTTCCACACGGATC | ACACACT | WA1 <sup>a</sup>                         |
| CTACGTCGACACACTACTAATCGTTCTTCCACACGGATC | ACACTAC | WA2 <sup>a</sup>                         |
| CTACGTCGACACAGATGTAATCGTTCTTCCACACGGATC | ACAGATG | WA3 <sup>a</sup>                         |
| CTACGTCGACACATCGTTAATCGTTCTTCCACACGGATC | ACATCGT | WA4 <sup>a</sup> ,<br>CLP1 <sup>b</sup>  |
| CTACGTCGACACATGAGTAATCGTTCTTCCACACGGATC | ACATGAG | WA5 <sup>a</sup> ,<br>CLP2 <sup>b</sup>  |
| CTACGTCGACACGAGACTAATCGTTCTTCCACACGGATC | ACGAGAC | WA6 <sup>a</sup> ,<br>CLP3 <sup>b</sup>  |
| CTACGTCGACACGTCTGTAATCGTTCTTCCACACGGATC | ACGTCTG | WA7 <sup>a</sup> ,<br>CAP1 <sup>b</sup>  |
| CTACGTCGACACTACTATAATCGTTCTTCCACACGGATC | ACTACTA | WA8 <sup>a</sup> ,<br>CAP2 <sup>b</sup>  |
| CTACGTCGACACTAGCTTAATCGTTCTTCCACACGGATC | ACTAGCT | WA9 <sup>a</sup> ,<br>CAP3 <sup>b</sup>  |
| CTACGTCGACACTATGCTAATCGTTCTTCCACACGGATC | ACTATGC | WA10 <sup>a</sup> ,<br>GLP1 <sup>b</sup> |
| CTACGTCGACACTGAGATAATCGTTCTTCCACACGGATC | ACTGAGA | WA11 <sup>a</sup> ,<br>GLP2 <sup>b</sup> |
| CTACGTCGACACTGCATTAATCGTTCTTCCACACGGATC | ACTGCAT | WA12 <sup>a</sup>                        |
| CTACGTCGACAGACAGCTAATCGTTCTTCCACACGGATC | AGACAGC | WB1 <sup>a</sup>                         |
| CTACGTCGACAGAGACTAATCGTTCTTCCACACGGATC  | AGAGCAC | WB2 <sup>a</sup>                         |
| CTACGTCGACAGATGCATAATCGTTCTTCCACACGGATC | AGATGCA | WB3 <sup>a</sup>                         |
| CTACGTCGACAGCAGCGTAATCGTTCTTCCACACGGATC | AGCAGCG | WB4 <sup>a</sup> ,<br>GLP3 <sup>b</sup>  |
| CTACGTCGACAGCATGATAATCGTTCTTCCACACGGATC | AGCATGA | WB5 <sup>a</sup> ,<br>GAP1               |
| CTACGTCGACAGCGAGTTAATCGTTCTTCCACACGGATC | AGCGAGT | WB6 <sup>a</sup> ,<br>GAP2 <sup>b</sup>  |

| Sequence                                 | Barcode  | Use                                      |
|------------------------------------------|----------|------------------------------------------|
| CTACGTCGACAGCTATCTAATCGTTCTTCCACACGGATC  | AGCTATC  | WB7 <sup>a</sup> ,<br>GAP3 <sup>b</sup>  |
| CTACGTCGACAGCTCATTAAATCGTTCTTCCACACGGATC | AGTCAT   | WB8 <sup>a</sup> ,<br>MLP1 <sup>b</sup>  |
| CTACGTCGACAGTACAGTAATCGTTCTTCCACACGGATC  | AGTACAG  | WB9 <sup>a</sup> ,<br>MLP2 <sup>b</sup>  |
| CTACGTCGACATAGCGATAATCGTTCTTCCACACGGATC  | ATAGCGA  | WB10 <sup>a</sup> ,<br>MLP3 <sup>b</sup> |
| CTACGTCGACATCACACTAATCGTTCTTCCACACGGATC  | ATCACAC  | WB11 <sup>a</sup> ,<br>MAP1 <sup>b</sup> |
| CTACGTCGACATCTACATAATCGTTCTTCCACACGGATC  | ATCTACA  | WB12 <sup>a</sup> ,<br>MAP2 <sup>b</sup> |
| CTACGTCGACATGCAGACTAATCGTTCTTCCACACGGATC | ATGCAGAC | WC1 <sup>a</sup>                         |
| CTACGTCGACATGCTCGCTAATCGTTCTTCCACACGGATC | ATGCTCGC | WC2 <sup>a</sup>                         |
| CTACGTCGACCACACATCTAATCGTTCTTCCACACGGATC | CACACATC | WC3 <sup>a</sup>                         |
| CTACGTCGACCACTACGCTAATCGTTCTTCCACACGGATC | CACTACGC | WC4 <sup>a</sup> ,<br>GAK3 <sup>b</sup>  |
| CTACGTCGACCACTCTCCTAATCGTTCTTCCACACGGATC | CACTCTCC | WC5 <sup>a</sup>                         |
| CTACGTCGACCAGATAGCTAATCGTTCTTCCACACGGATC | CAGATAGC | WC6 <sup>a</sup>                         |
| CTACGTCGACCAGCGCTCTAATCGTTCTTCCACACGGATC | CAGCGCTC | WC7 <sup>a</sup>                         |
| CTACGTCGACCATATCACTAATCGTTCTTCCACACGGATC | CATATCAC | WC8 <sup>a</sup>                         |
| CTACGTCGACCATGATCCTAATCGTTCTTCCACACGGATC | CATGATCC | WC9 <sup>a</sup>                         |
| CTACGTCGACCGACGAGCTAATCGTTCTTCCACACGGATC | CGACGAGC | WC10 <sup>a</sup> ,<br>MAP3 <sup>b</sup> |
| CTACGTCGACCGAGACGCTAATCGTTCTTCCACACGGATC | CGAGACGC | WC11 <sup>a</sup> ,<br>NLP1 <sup>b</sup> |
| CTACGTCGACCGATAGACTAATCGTTCTTCCACACGGATC | CGATAGAC | WC12 <sup>a</sup>                        |
| CTACGTCGACCGCGCTGCTAATCGTTCTTCCACACGGATC | CGCGCTGC | WD1 <sup>a</sup>                         |

| Sequence                                  | Barcode   | Use                                      |
|-------------------------------------------|-----------|------------------------------------------|
| CTACGTCGACCGCTGACCTAATCGTTCTTCCACACGGATC  | CGCTGACC  | WD2 <sup>a</sup>                         |
| CTACGTCGACCGTCACACTAATCGTTCTTCCACACGGATC  | CGTCACAC  | WD3 <sup>a</sup>                         |
| CTACGTCGACCGTGTATCTAATCGTTCTTCCACACGGATC  | CGTGTATC  | WD4 <sup>a</sup>                         |
| CTACGTCGACCTACAGTCTAATCGTTCTTCCACACGGATC  | CTACAGTC  | WD5 <sup>a</sup>                         |
| CTACGTCGACCTAGCATCTAATCGTTCTTCCACACGGATC  | CTAGCATC  | WD6 <sup>a</sup>                         |
| CTACGTCGACCTATATGCTAATCGTTCTTCCACACGGATC  | CTATATGC  | WD7 <sup>a</sup>                         |
| CTACGTCGACCTCAGCACTAATCGTTCTTCCACACGGATC  | CTCAGCAC  | WD8 <sup>a</sup>                         |
| CTACGTCGACCTCGAGCCTAATCGTTCTTCCACACGGATC  | CTCGAGCC  | WD9 <sup>a</sup>                         |
| CTACGTCGACCTCGTAGCTAATCGTTCTTCCACACGGATC  | CTCGTAGC  | WD10 <sup>a</sup> ,<br>NLP2 <sup>b</sup> |
| CTACGTCGACCTCTCGTCTAATCGTTCTTCCACACGGATC  | CTCTCGTC  | WD11 <sup>a</sup> ,<br>NLP3 <sup>b</sup> |
| CTACGTCGACCTGACGCCTAATCGTTCTTCCACACGGATC  | CTGACGCC  | WD12 <sup>a</sup> ,<br>NAP1 <sup>b</sup> |
| CTACGTCGACCTGCGACGCTAATCGTTCTTCCACACGGATC | CTGCGACGC | WE1 <sup>a</sup>                         |
| CTACGTCGACCTGTCAGGCTAATCGTTCTTCCACACGGATC | CTGTCAGGC | WE2 <sup>a</sup>                         |
| CTACGTCGACGACATCTGCTAATCGTTCTTCCACACGGATC | GACATCTGC | WE3 <sup>a</sup>                         |
| CTACGTCGACGACGCGAGCTAATCGTTCTTCCACACGGATC | GACGCGAGC | WE4 <sup>a</sup> ,<br>NAP2 <sup>b</sup>  |
| CTACGTCGACGAGACACGCTAATCGTTCTTCCACACGGATC | GAGACACGC | WE5 <sup>a</sup>                         |
| CTACGTCGACGAGCACGGCTAATCGTTCTTCCACACGGATC | GAGCACGGC | WE6 <sup>a</sup>                         |
| CTACGTCGACGAGTAGCGCTAATCGTTCTTCCACACGGATC | GAGTAGCGC | WE7 <sup>a</sup> ,<br>NAP3 <sup>b</sup>  |
| CTACGTCGACGAGTGTAGCTAATCGTTCTTCCACACGGATC | GAGTGTAGC | WE8 <sup>a</sup>                         |
| CTACGTCGACGATAGATGCTAATCGTTCTTCCACACGGATC | GATAGATGC | WE9 <sup>a</sup>                         |
| CTACGTCGACGATCAGAGCTAATCGTTCTTCCACACGGATC | GATCAGAGC | WE10 <sup>a</sup> ,<br>CLK1 <sup>b</sup> |

| Sequence                                   | Barcode    | Use                                      |
|--------------------------------------------|------------|------------------------------------------|
| CTACGTCGACGATGTAGGCTAATCGTTCTTCCACACGGATC  | GATGTAGGC  | WE11 <sup>a</sup> ,<br>CLK2 <sup>b</sup> |
| CTACGTCGACGCACTCAGCTAATCGTTCTTCCACACGGATC  | GCACTCAGC  | WE12 <sup>a</sup> ,<br>CLK3 <sup>b</sup> |
| CTACGTCGACGCAGAGTGCTAATCGTTCTTCCACACGGATC  | GCAGAGTGC  | WF1 <sup>a</sup>                         |
| CTACGTCGACGCAGCAGGCTAATCGTTCTTCCACACGGATC  | GCAGCAGGC  | WF2 <sup>a</sup>                         |
| CTACGTCGACGCGACGAGCTAATCGTTCTTCCACACGGATC  | GCGACGAGC  | WF3 <sup>a</sup> ,<br>CAK1 <sup>b</sup>  |
| CTACGTCGACGCTCATGGCTAATCGTTCTTCCACACGGATC  | GCTCATGGC  | WF4 <sup>a</sup> ,<br>CAK2 <sup>b</sup>  |
| CTACGTCGACGCTCGACGCTAATCGTTCTTCCACACGGATC  | GCTCGACGC  | WF5 <sup>a</sup> ,<br>CAK3 <sup>b</sup>  |
| CTACGTCGACGTACATCGCTAATCGTTCTTCCACACGGATC  | GTACATCGC  | WF6 <sup>a</sup>                         |
| CTACGTCGACGTAGACAGCTAATCGTTCTTCCACACGGATC  | GTAGACAGC  | WF7 <sup>a</sup>                         |
| CTACGTCGACGTATCACGCTAATCGTTCTTCCACACGGATC  | GTATCACGC  | WF8 <sup>a</sup>                         |
| CTACGTCGACGTCACTGGCTAATCGTTCTTCCACACGGATC  | GTCACTGGC  | WF9 <sup>a</sup> ,<br>GLK1 <sup>b</sup>  |
| CTACGTCGACGTCTGATGCTAATCGTTCTTCCACACGGATC  | GTCTGATGC  | WF10 <sup>a</sup>                        |
| CTACGTCGACGTGAGCGGCTAATCGTTCTTCCACACGGATC  | GTGAGCGGC  | WF11 <sup>a</sup> ,<br>GLK2 <sup>b</sup> |
| CTACGTCGACGTGCTATGCTAATCGTTCTTCCACACGGATC  | GTGCTATGC  | WF12 <sup>a</sup> ,<br>GLK3 <sup>b</sup> |
| CTACGTCGACGTGTACTAGCTAATCGTTCTTCCACACGGATC | GTGTACTAGC | WG1 <sup>a</sup>                         |
| CTACGTCGACTACACTAAGCTAATCGTTCTTCCACACGGATC | TACACTAAGC | WG2 <sup>a</sup>                         |
| CTACGTCGACTACAGAGAGCTAATCGTTCTTCCACACGGATC | TACAGAGAGC | WG3 <sup>a</sup> ,<br>GAK1 <sup>b</sup>  |
| CTACGTCGACTACGACTAGCTAATCGTTCTTCCACACGGATC | TACGACTAGC | WG4 <sup>a</sup> ,<br>GAK2 <sup>b</sup>  |

| Sequence                                   | Barcode    | Use                                      |
|--------------------------------------------|------------|------------------------------------------|
| CTACGTCGACTAGAGCAAGCTAATCGTTCTTCCACACGGATC | TAGAGCAAGC | WG5 <sup>a</sup>                         |
| CTACGTCGACTAGCTACAGCTAATCGTTCTTCCACACGGATC | TAGCTACAGC | WG6 <sup>a</sup> ,<br>CAK3 <sup>b</sup>  |
| CTACGTCGACTAGTCGTAGCTAATCGTTCTTCCACACGGATC | TAGTCGTAGC | WG7 <sup>a</sup>                         |
| CTACGTCGACTATATGTAGCTAATCGTTCTTCCACACGGATC | TATATGTAGC | WG8 <sup>a</sup>                         |
| CTACGTCGACTATCGCGAGCTAATCGTTCTTCCACACGGATC | TATCGCGAGC | WG9 <sup>a</sup> ,<br>MLK1 <sup>b</sup>  |
| CTACGTCGACTATGCACAGCTAATCGTTCTTCCACACGGATC | TATGCACAGC | WG10 <sup>a</sup> ,<br>MLK2 <sup>b</sup> |
| CTACGTCGACTCACGATAGCTAATCGTTCTTCCACACGGATC | TCACGATAGC | WG11 <sup>a</sup> ,<br>MLK3 <sup>b</sup> |
| CTACGTCGACTCATAGCAGCTAATCGTTCTTCCACACGGATC | TCATAGCAGC | WG12 <sup>a</sup> ,<br>MAK1              |
| CTACGTCGACTCATGTAAGCTAATCGTTCTTCCACACGGATC | TCATGTAAGC | WH1 <sup>a</sup>                         |
| CTACGTCGACTCGACATAGCTAATCGTTCTTCCACACGGATC | TCGACATAGC | WH2 <sup>a</sup>                         |
| CTACGTCGACTCGCACAAGCTAATCGTTCTTCCACACGGATC | TCGCACAAGC | WH3 <sup>a</sup>                         |
| CTACGTCGACTCTATAGAGCTAATCGTTCTTCCACACGGATC | TCTATAGAGC | WH4 <sup>a</sup> ,<br>MAK2 <sup>b</sup>  |
| CTACGTCGACTCTGACGAGCTAATCGTTCTTCCACACGGATC | TCTGACGAGC | WH5 <sup>a</sup> ,<br>MAK3 <sup>b</sup>  |
| CTACGTCGACTGAGTAGAGCTAATCGTTCTTCCACACGGATC | TGAGTAGAGC | WH6 <sup>a</sup> ,<br>NLK1 <sup>b</sup>  |
| CTACGTCGACTGCATACAGCTAATCGTTCTTCCACACGGATC | TGCATACAGC | WH7 <sup>a</sup> ,<br>NLK2 <sup>b</sup>  |
| CTACGTCGACTGCGTCAAGCTAATCGTTCTTCCACACGGATC | TGCGTCAAGC | WH8 <sup>a</sup> ,<br>NLK3 <sup>b</sup>  |
| CTACGTCGACTGCTCGAAGCTAATCGTTCTTCCACACGGATC | TGCTCGAAGC | WH9 <sup>a</sup> ,<br>NAK1 <sup>b</sup>  |

| Sequence                                   | Barcode    | Use                                      |
|--------------------------------------------|------------|------------------------------------------|
| CTACGTCGACTGCTGTGAGCTAATCGTTCTTCCACACGGATC | TGCTGTGAGC | WH10 <sup>a</sup> ,<br>NAK2 <sup>b</sup> |
| CTACGTCGACTGTAGTCAGCTAATCGTTCTTCCACACGGATC | TGTAGTCAGC | WH11 <sup>a</sup> ,<br>NAK3 <sup>b</sup> |
| CTACGTCGACTGTCAGTAGCTAATCGTTCTTCCACACGGATC | TGTCAGTAGC | WH12 <sup>a</sup>                        |
| ACGTACAATTGACGATGTTGAGAACGGTTCGGCATTG      | ACGAT      | Cbf1 P1 <sup>a</sup>                     |
| ACGTACAATTGACGCAGTTGAGAACGGTTCGGCATTG      | ACGCA      | Cbf1 P2 <sup>a</sup>                     |
| ACGTACAATTGACGTGGTTGAGAACGGTTCGGCATTG      | ACGTG      | Cbf1 P3 <sup>a</sup>                     |
| ACGTACAATTGAGCGCGTTGAGAACGGTTCGGCATTG      | AGCGC      | Cbf1 P4 <sup>a</sup>                     |
| ACGTACAATTGAGCTGGTTGAGAACGGTTCGGCATTG      | AGCTG      | Cbf1 P5 <sup>a</sup>                     |
| ACGTACAATTGAGTCGGTTGAGAACGGTTCGGCATTG      | AGTCG      | Cbf1 P6 <sup>a</sup>                     |
| ACGTACAATTGATATGGTTGAGAACGGTTCGGCATTG      | ATATG      | Cbf1 P7 <sup>a</sup>                     |
| ACGTACAATTGATGACGTTGAGAACGGTTCGGCATTG      | ATGAC      | Cbf1 P8 <sup>a</sup>                     |
| ACGTACAATTGATGTAGTTGAGAACGGTTCGGCATTG      | ATGTA      | Cbf1 P9 <sup>a</sup>                     |
| ACGTACAATTGCACGAGTTGAGAACGGTTCGGCATTG      | CACGA      | Cbf1 P10 <sup>a</sup>                    |
| ACGTACAATTGCAGATTGTTGAGAACGGTTCGGCATTG     | CAGATT     | Met31 P1 <sup>a</sup>                    |
| ACGTACAATTGCAGTGTGTTGAGAACGGTTCGGCATTG     | CAGTGT     | Met31 P2 <sup>a</sup>                    |
| ACGTACAATTGCGACATGTTGAGAACGGTTCGGCATTG     | CGACAT     | Met31 P3 <sup>a</sup>                    |
| ACGTACAATTGCGAGCTGTTGAGAACGGTTCGGCATTG     | CGAGCT     | Met31 P4 <sup>a</sup>                    |
| ACGTACAATTGCGTAGTGTTGAGAACGGTTCGGCATTG     | CGTAGT     | Met31 P5 <sup>a</sup>                    |
| ACGTACAATTGCGTCTTGTTGAGAACGGTTCGGCATTG     | CGTCTT     | Met31 P6 <sup>a</sup>                    |
| ACGTACAATTGCGTGATGTTGAGAACGGTTCGGCATTG     | CGTGAT     | Met31 P7 <sup>a</sup>                    |
| ACGTACAATTGCTCTATGTTGAGAACGGTTCGGCATTG     | CTCTAT     | Met31 P8 <sup>a</sup>                    |
| ACGTACAATTGCTGAGTGTTGAGAACGGTTCGGCATTG     | CTGAGT     | Met31 P9 <sup>a</sup>                    |
| ACGTACAATTGCTGTCTGTTGAGAACGGTTCGGCATTG     | CTGTCT     | Met31 P10 <sup>a</sup>                   |

| Sequence                                 | Barcode  | Use                   |
|------------------------------------------|----------|-----------------------|
| ACGTACAATTGGACATACGTTGAGAACGGTTCGGCATTG  | GACATAC  | Nrg1 P1 <sup>a</sup>  |
| ACGTACAATTGGACTGACGTTGAGAACGGTTCGGCATTG  | GACTGAC  | Nrg1 P2 <sup>a</sup>  |
| ACGTACAATTGGATCGACGTTGAGAACGGTTCGGCATTG  | GATCGAC  | Nrg1 P3 <sup>a</sup>  |
| ACGTACAATTGGATGTACGTTGAGAACGGTTCGGCATTG  | GATGTAC  | Nrg1 P4 <sup>a</sup>  |
| ACGTACAATTGGCACAACGTTGAGAACGGTTCGGCATTG  | GCACAAC  | Nrg1 P5 <sup>a</sup>  |
| ACGTACAATTGGCGACACGTTGAGAACGGTTCGGCATTG  | GCGACAC  | Nrg1 P6 <sup>a</sup>  |
| ACGTACAATTGGCGCGACGTTGAGAACGGTTCGGCATTG  | GCGCGAC  | Nrg1 P7 <sup>a</sup>  |
| ACGTACAATTGGCGTAACGTTGAGAACGGTTCGGCATTG  | GCGTAAC  | Nrg1 P8 <sup>a</sup>  |
| ACGTACAATTGGTACGACGTTGAGAACGGTTCGGCATTG  | GTACGAC  | Nrg1 P9 <sup>a</sup>  |
| ACGTACAATTGGTGATACGTTGAGAACGGTTCGGCATTG  | GTGATAC  | Nrg1 P10 <sup>a</sup> |
| ACGTACAATTGGTGTGCACGTTGAGAACGGTTCGGCATTG | GTGTGCAC | Gcn4 P1 <sup>a</sup>  |
| ACGTACAATTGTAGCGCACGTTGAGAACGGTTCGGCATTG | TAGCGCAC | Gcn4 P2 <sup>a</sup>  |
| ACGTACAATTGTATAGCACGTTGAGAACGGTTCGGCATTG | TATAGCAC | Gcn4 P3 <sup>a</sup>  |
| ACGTACAATTGTATCTCACGTTGAGAACGGTTCGGCATTG | TATCTCAC | Gcn4 P4 <sup>a</sup>  |
| ACGTACAATTGTATGACACGTTGAGAACGGTTCGGCATTG | TATGACAC | Gcn4 P5 <sup>a</sup>  |
| ACGTACAATTGTCGAGCACGTTGAGAACGGTTCGGCATTG | TCGAGCAC | Gcn4 P6 <sup>a</sup>  |
| ACGTACAATTGTCTATCACGTTGAGAACGGTTCGGCATTG | TCTATCAC | Gcn4 P7 <sup>a</sup>  |
| ACGTACAATTGTCTGCCACGTTGAGAACGGTTCGGCATTG | TCTGCCAC | Gcn4 P8 <sup>a</sup>  |
| ACGTACAATTGTGACGCACGTTGAGAACGGTTCGGCATTG | TGACGCAC | Gcn4 P9 <sup>a</sup>  |
| ACGTACAATTGTGAGTCACGTTGAGAACGGTTCGGCATTG | TGAGTCAC | Gcn4 P10 <sup>a</sup> |

<sup>a</sup>W = Well and P = Plate, so WA1 is Well A1 and P1 is Plate 1.

<sup>b</sup>ChIPed sample barcode: C=Cbf1-tagged; G=Gcn4-tagged; A=AAS; L=Glucose; K=Input; P=IP;

1-3=Sample replicate. So CLP1=Cbf1-tagged IP in glucose, replicate 1.

Synthetic promoters were amplified by using one well-specific PCR primer and one plate-specific PCR primer. Custom adapters were ligated on to the products and sequenced on an Illumina MiSEQ machine.



A subset of well-specific primers were reused to barcode CHIP samples for multiplexing on an Illumina HiSEQ 2000. All primers are listed in 5'-3' order.

**Table S2: Oligonucleotides used for strain manipulation, validation, PCR, and sequencing**

| <b>Name</b> | <b>Sequence</b>                 | <b>Purpose</b>                                 |
|-------------|---------------------------------|------------------------------------------------|
| RZ84        | 5'-GATCGTATCACGTGCTTTAC-3'      | Cbf1 site, forward                             |
| RZ85        | 3'-CATAGTGCACGAAATGCTAG-5'      | Cbf1 site, reverse                             |
| RZ86        | 5'-GATCGTAATGACTCATTAC-3'       | Gcn4 site, forward                             |
| RZ87        | 3'-CATTACTGAGTAAATGCTAG-5'      | Gcn4 site, reverse                             |
| RZ88        | 5'-GATCGTAGCCACAGTTTTAC-3'      | Met 31/32 site, forward                        |
| RZ89        | 3'-CATCGGTGTCAAATGCTAG-5'       | Met 31/32 site, reverse                        |
| RZ90        | 5'-GATCGTATGAGGACCCTTAC-3'      | Nrg1 site, forward                             |
| RZ91        | 3'-CATACTCCTGGGAATGCTAG-5'      | Nrg1 site, reverse                             |
| RZ92        | 5'-CATTCTTACCCACTCCTGTTCTAG -3' | Gcn4 Avi-tagging check, upstream PCR primer    |
| RZ93        | 5'-CGCGTCTGACTTCTAATCAGAAG-3'   | Gcn4 Avi-tagging check, downstream PCR primer  |
| RZ94        | 5'-CCGATGAAGCAAACATCGAAAAG -3'  | Cbf1 Avi-tagging check, upstream PCR primer    |
| RZ95        | 5'-TCCGTCCCGTCCTCTTTTAC -3'     | Cbf1 Avi-tagging check, downstream PCR primer  |
| RZ96        | 5'-CCGGAAAATATGGCTAGAGGTC -3'   | Met31 Avi-tagging check, upstream PCR primer   |
| RZ97        | 5'-GTACGTCACCACTTTGTGCG -3'     | Met31 Avi-tagging check, downstream PCR primer |

| Name  | Sequence                                                                                    | Purpose                                        |
|-------|---------------------------------------------------------------------------------------------|------------------------------------------------|
| RZ98  | 5'-CGGAAGCAAAGAACAGATCCA -3'                                                                | Nrg1 Avi-tagging check, upstream PCR primer    |
| RZ99  | 5'-CCAGACATGATCTTAAGCGGAAG -3'                                                              | Nrg1 Avi-tagging check, downstream PCR primer  |
| RZ127 | 5'-<br>GACATGATAATTGCTTGCAACACTATAGAACACATTT<br>GAAAAAGGGACAAGGGATCGAGCAGAAGCTGAT -3'       | myc-C-Avi tagging primer, Nrg1, upstream       |
| RZ128 | 5'-<br>AGTGCGGAATAGTAGTACTGCTAATGAGAAAAACAC<br>GGGTATACCGTCAACTGCAGGTCGACAACCCTTAAT<br>-3'  | myc-C-Avi tagging primer, Nrg1, downstream     |
| RZ129 | 5'-<br>AACAAGAGAACGAAAGAAAAAGCACTAGGAGCGA<br>TAATCCACATGAGGCTGGGATCGAGCAGAAGCTGA<br>T -3'   | myc-C-Avi tagging primer, Cbfl, upstream       |
| RZ130 | 5'-<br>GTGCTATGGGGCAGAGACGCAGATACATAGGGAGA<br>CTCGAAATACATTTACTGCAGGTCGACAACCCTTAA<br>T -3' | myc-C-Avi tagging primer, Cbfl, downstream     |
| RZ131 | 5'-<br>CTTTTTTGTGCCTTTGTTACGTCTATATTCTATTGAAA<br>CTGGAGCTCGTTTTTCGACACTGG -3'               | Insert PCORE into lys-2, upstream PCR primer   |
| RZ132 | 5'-<br>TATTATATATTATTCTCGGAGTTTTTAAGTGACATCAC<br>CCTCCTTACCATTAAGTTGATC -3'                 | Insert PCORE into lys-2, downstream PCR primer |
| RZ133 | 5'-<br>CTTTTTTGTGCCTTTCTTACGTCTATATTCATTGAAAC<br>TGGACTGGGTCATGGCTGCG -3'                   | Insert BirA into lys-2, upstream PCR primer    |
| RZ134 | 5'-<br>TATTATATATTATTCTCGGAGTTTTTAAGTGACATCAC<br>CCAAGCTTGCAAATTAAGCCTTCGAG -3'             | Insert BirA into lys-2, downstream PCR primer  |

| Name  | Sequence                                                                       | Purpose                                                                         |
|-------|--------------------------------------------------------------------------------|---------------------------------------------------------------------------------|
| RZ135 | 5'-<br>GCTCATCAAGGATGCGATAAAGAATGGTACCGGCCT<br>GTTGGGGATCGAGCAGAAGCTGAT -3'    | myc-C-Avi tagging<br>primer, Met31,<br>upstream                                 |
| RZ136 | 5'-<br>ATTCTACTTATCTCAATGGCTAAAGTATATATCTATCT<br>ATCTGCAGGTCGACAACCCTTAAT -3'  | myc-C-Avi tagging<br>primer, Met31,<br>downstream                               |
| RZ137 | 5'-<br>AAATGAGGTTGCCAGATTAAAGAAATTAGTTGGCGA<br>ACGCGGGATCGAGCAGAAGCTGAT -3'    | myc-C-Avi tagging<br>primer, Gcn4,<br>upstream                                  |
| RZ138 | 5'-<br>GCGTGGTGTAATAATTCTACTTAAGAAAATTGGCATA<br>AAAAGTGCAGGTCGACAACCCTTAAT -3' | myc-C-Avi tagging<br>primer, Gcn4,<br>downstream                                |
| RZ143 | 5'-CGACCTCATGCTATACCTGAGAAAG -3'                                               | myc-C-avi<br>integration check<br>PCR primer,<br>upstream, internal to<br>tag   |
| RZ144 | 5'-TGGGGATGTATGGGCTAAATGTAC -3'                                                | myc-C-Avi<br>integration check<br>PCR primer,<br>downstream, internal<br>to Kan |
| RZ147 | 5'-GCAGTTGCTTTCTCCTATGGGAAG -3'                                                | PCORE and BirA<br>integration check<br>PCR primer,<br>upstream                  |
| RZ148 | 5'-GAATTGGTCAGTATCGACCTGTGAA -3'                                               | PCORE and Bira<br>integration check<br>PCR primer,<br>downstream                |
| RZ149 | 5'-GTTAGAAGAAAAGAGTCGGGATCTCTG -3'                                             | BirA integration<br>check PCR primer,<br>upstream, internal to<br>BirA          |

| Name  | Sequence                        | Purpose                                                         |
|-------|---------------------------------|-----------------------------------------------------------------|
| RZ150 | 5'-CTGTACAGACGCGTGTACGC -3'     | BirA integration check PCR primer, downstream, internal to BirA |
| RZ151 | 5'-TTAAGTCCGGGGATCCCCAG -3'     | Universal myc-C-Avi-tag sequencing primer, internal to Avi tag. |
| RZ158 | 5'-GGGAGGAGTCATGGCAAATA -3'     | Cbf1 ChIP check qPCR primer: ADE765.                            |
| RZ159 | 5'-CGTATACGGTGACGACGAGA -3'     | 5' PRIMER AROUND ADE756 SET 2 SET 4                             |
| RZ169 | 5'-TAGGGGCTTAGCATCCACAC -3'     | SUC2 qPCR Primer                                                |
| RZ170 | 5'-TGGATACCTTCGACAGCTCA -3'     | SUC2 qPCR Primer                                                |
| RZ177 | 5'-CCCCTAAACATTCAGATTGTAAAC -3' | Gcn4 ChIP check qPCR primer (YJR109C)                           |
| RZ178 | 5'-TCTCGATGCTTACTCAAGGTG -3'    | Gcn4 ChiP check qPCR primer (YJR109C)                           |
| RZ183 | 5'-GCCGCCACAGAAAATTAC -3'       | Met31 ChIP check qPCR primer (YNL278W)                          |
| RZ184 | 5'-GAGCTATGGGCAATTGTACG -3'     | Met31 ChiP check qPCR primer (YNL278W)                          |
| RZ193 | 5'-CCGGAAAAGAAGGGAAAAAT -3'     | Nrg1 ChIP check qPCR primer (YDR043C)                           |

| Name    | Sequence                                                                                                | Purpose                                                                                   |
|---------|---------------------------------------------------------------------------------------------------------|-------------------------------------------------------------------------------------------|
| RZ194   | 5'-CCTGCAGCCAGACTGTAGAA -3'                                                                             | Nrg1 ChIP check qPCR primer (YDR043C)                                                     |
| RZ226   | 5'-CCCTCGTTCAATTGCTCACCTCGAC -3'                                                                        | Custom read 1 sequencing primer for sequencing synthetic promoters.                       |
| RZ227   | 5'-GCTCCCCATTCACGAATTG-3'                                                                               | Custom read 2 sequencing primer for synthetic promoters                                   |
| RZ230   | /5Phos/<br>TCGAGGTGAGCAATTGAACGAGGGGTGTAGATCTC<br>GGTGGTCGCCGTATCATT -3'                                | Read 1 flow cell adapter and sequencing primer                                            |
| RZ231   | /5Phos/<br>AATTCGTGAAATGGGGAGCATCTCGTATGCCGTCTT<br>CTGCTTG -3'                                          | Read 2 flow cell adapter and sequencing primer                                            |
| RZ232   | 5'-<br>AATGATACGGCGACCACCGAGATCTACACCCCTCGT<br>TCAATTGCTCACC -3'                                        | Read 1 flow cell adapter and sequencing primer (reverse complement)                       |
| RZ233   | 5'-<br>CAAGCAGAAGACGGCATAACGAGATGCTCCCCATTC<br>ACG -3'                                                  | Read 2 flow cell adapter and sequencing primer (reverse complement)                       |
| RZ257.1 | 5'-<br>CAAGCAGAAGACGGCATAACGAGATCGGTCTCGGCA<br>TTCCTGCTGAACCGCTCTTCCGATCTGTTGAGAACG<br>GTTCCGGCATTG -3' | Downstream pcr primer for synthetic promoter amplification for sequencing post-ChIP (1/4) |

| Name    | Sequence                                                                                                  | Purpose                                                                                                   |
|---------|-----------------------------------------------------------------------------------------------------------|-----------------------------------------------------------------------------------------------------------|
| RZ257.2 | 5'-<br>CAAGCAGAAGACGGCATAACGACGATCGGTCTCGGC<br>ATTCCTGCTGAACCGCTCTTCCGATCTCGTTGAGAA<br>CGGTTCGGCATTG -3'  | Downstream pcr<br>primer for synthetic<br>promoter<br>amplification for<br>sequencing post-<br>ChIP (2/4) |
| RZ257.3 | 5'-<br>CAAGCAGAAGACGGCATAACGAGATCGGTCTCGGCA<br>TTCCTGCTGAACCGCTCTTCCGATCTTAGTTGAGAA<br>CGGTTCGGCATTG -3'  | Downstream pcr<br>primer for synthetic<br>promoter<br>amplification for<br>sequencing post-<br>ChIP (3/4) |
| RZ257.4 | 5'-<br>CAAGCAGAAGACGGCATAACGAGATCGGTCTCGGCA<br>TTCCTGCTGAACCGCTCTTCCGATCTACAGTTGAGA<br>ACGGTTCGGCATTG -3' | Downstream pcr<br>primer for synthetic<br>promoter<br>amplification for<br>sequencing post-<br>ChIP (4/4) |
| RZ259   | 5'- TGTAATCGTTCTTCCACACGGATC -3'                                                                          | qPCR Primer for<br>library concentration<br>check, post prep.                                             |
| RZ260   | 5'- TTCCTGCTGAACCGCTCTTC-3'                                                                               | qPCR Primer for<br>library concentration<br>check, post prep.                                             |

**Table S3: List of all promoters and condition-specific expression and occupancy values**

| <b>Promoter</b> | <b>Glucose Expression</b> | <b>Glucose Occupancy</b> | <b>AAS Expression</b> | <b>AAS Occupancy</b> | <b>Tagged Factor</b> |
|-----------------|---------------------------|--------------------------|-----------------------|----------------------|----------------------|
| c               | 4.48                      | 1.96                     | 4.48                  | 1.92                 | Cbfl                 |
| C               | 4.87                      | 2.15                     | 4.51                  | 2.11                 | Cbfl                 |
| cC              | 6.50                      | 4.71                     | NA                    | 4.27                 | Cbfl                 |
| cCcNC           | 6.84                      | 8.60                     | NA                    | 7.40                 | Cbfl                 |
| cCnGGn          | 3.34                      | 3.04                     | 5.89                  | 4.04                 | Cbfl                 |
| cCNm            | 6.19                      | 4.07                     | NA                    | 4.09                 | Cbfl                 |
| cg              | 2.82                      | 1.69                     | 3.16                  | 1.96                 | Cbfl                 |
| Cg              | 6.28                      | 1.85                     | NA                    | 2.14                 | Cbfl                 |
| cgg             | 2.06                      | 0.03                     | 5.04                  | 0.03                 | Cbfl                 |
| cgGm            | 3.21                      | 1.28                     | NA                    | 1.63                 | Cbfl                 |
| CGGn            | 2.03                      | 1.34                     | NA                    | 1.70                 | Cbfl                 |
| cgm             | 6.62                      | 1.57                     | NA                    | 1.87                 | Cbfl                 |
| CgM             | 3.77                      | 0.05                     | NA                    | 0.05                 | Cbfl                 |
| cGN             | 3.96                      | 1.30                     | NA                    | 1.65                 | Cbfl                 |
| CgnM            | 4.04                      | NA                       | NA                    | NA                   | Cbfl                 |
| cGnmM           | 5.47                      | 1.58                     | NA                    | 2.14                 | Cbfl                 |
| cgnN            | 1.80                      | 0.85                     | 4.34                  | 1.38                 | Cbfl                 |
| cm              | 4.13                      | 3.50                     | NA                    | 2.68                 | Cbfl                 |
| CMcC            | 2.70                      | 0.05                     | 5.18                  | 0.05                 | Cbfl                 |
| cmG             | 6.48                      | 1.85                     | NA                    | 2.18                 | Cbfl                 |
| cMgN            | 1.00                      | 0.04                     | NA                    | 0.05                 | Cbfl                 |
| cmM             | 6.05                      | 2.28                     | NA                    | 2.55                 | Cbfl                 |



| Promoter | Glucose Expression | Glucose Occupancy | AAS Expression | AAS Occupancy | Tagged Factor |
|----------|--------------------|-------------------|----------------|---------------|---------------|
| cmn      | 3.77               | 1.64              | 5.20           | 2.01          | Cbfl          |
| CMn      | 4.40               | 2.00              | 5.62           | 2.38          | Cbfl          |
| CMNgC    | 2.22               | 0.05              | NA             | 0.05          | Cbfl          |
| CMnmg    | 5.88               | 1.78              | NA             | 2.31          | Cbfl          |
| CMNMn    | 3.80               | 1.84              | 4.51           | 2.30          | Cbfl          |
| cN       | 3.94               | 1.66              | 4.20           | 1.91          | Cbfl          |
| Cn       | 2.91               | 1.97              | 3.13           | 2.08          | Cbfl          |
| CN       | 3.96               | 1.89              | 4.17           | 2.09          | Cbfl          |
| cNCCM    | 4.28               | 0.04              | NA             | 0.04          | Cbfl          |
| Cng      | 4.68               | 1.48              | NA             | 1.83          | Cbfl          |
| cngCnG   | 4.77               | 3.52              | NA             | 3.63          | Cbfl          |
| cnGN     | 1.66               | 0.70              | 3.49           | 1.17          | Cbfl          |
| CNGNmn   | 0.89               | 0.72              | 1.77           | 1.01          | Cbfl          |
| cnm      | 6.83               | NA                | NA             | NA            | Cbfl          |
| cNM      | 4.00               | 1.68              | NA             | 2.09          | Cbfl          |
| cnNm     | 2.45               | 1.06              | 3.54           | 1.34          | Cbfl          |
| g        | 1.73               | 0.10              | 3.16           | 0.10          | Cbfl          |
| G        | 1.60               | 0.10              | 3.06           | 0.09          | Cbfl          |
| gc       | 3.00               | 0.05              | 6.67           | 0.05          | Cbfl          |
| Gc       | 6.25               | 2.08              | NA             | 2.26          | Cbfl          |
| GcgG     | 3.60               | 1.58              | NA             | 1.61          | Cbfl          |
| GCgggn   | 2.41               | 1.78              | NA             | 1.52          | Cbfl          |
| gcmm     | 7.61               | 1.96              | NA             | 2.30          | Cbfl          |

| Promoter | Glucose Expression | Glucose Occupancy | AAS Expression | AAS Occupancy | Tagged Factor |
|----------|--------------------|-------------------|----------------|---------------|---------------|
| gCN      | 4.57               | 1.76              | 6.52           | 1.98          | Cbfl          |
| Gcn      | 4.41               | 1.61              | NA             | 1.82          | Cbfl          |
| gg       | 2.80               | 0.99              | NA             | 0.79          | Cbfl          |
| Gg       | 2.72               | 0.29              | 3.88           | 0.66          | Cbfl          |
| GG       | 2.23               | 0.10              | 4.88           | 0.10          | Cbfl          |
| gGCm     | 4.91               | NA                | NA             | NA            | Cbfl          |
| gGCn     | 5.02               | 1.89              | 8.19           | 2.27          | Cbfl          |
| gGm      | 2.50               | 0.08              | 4.75           | 0.09          | Cbfl          |
| gGM      | 2.04               | 0.05              | NA             | 0.05          | Cbfl          |
| ggMMM    | 5.15               | 0.14              | NA             | 0.15          | Cbfl          |
| GGmn     | 1.57               | 0.09              | 2.55           | 0.08          | Cbfl          |
| ggNm     | 1.17               | 0.04              | 3.82           | 0.03          | Cbfl          |
| gGnm     | 1.12               | 0.10              | 2.03           | 0.10          | Cbfl          |
| GGNmc    | 5.27               | 2.59              | NA             | 3.10          | Cbfl          |
| ggnN     | 0.72               | 0.07              | 1.80           | 0.08          | Cbfl          |
| gM       | 4.55               | 0.07              | NA             | 0.07          | Cbfl          |
| Gm       | 2.03               | 0.09              | 3.39           | 0.08          | Cbfl          |
| GM       | 2.42               | 0.45              | 4.19           | 0.23          | Cbfl          |
| GMC      | 8.63               | 2.14              | NA             | 2.35          | Cbfl          |
| gMG      | 2.32               | 0.33              | 5.23           | 0.86          | Cbfl          |
| GmGg     | 2.57               | NA                | 4.88           | NA            | Cbfl          |
| GmGggN   | 2.74               | NA                | 4.95           | NA            | Cbfl          |
| Gmgm     | 1.95               | NA                | NA             | NA            | Cbfl          |

| Promoter | Glucose Expression | Glucose Occupancy | AAS Expression | AAS Occupancy | Tagged Factor |
|----------|--------------------|-------------------|----------------|---------------|---------------|
| GmgmGG   | 2.33               | NA                | NA             | NA            | Cbfl          |
| gMgn     | 1.66               | 0.08              | 3.32           | 0.09          | Cbfl          |
| gMGn     | 1.59               | 0.10              | 3.20           | 0.13          | Cbfl          |
| Gmgnm    | 1.39               | 0.13              | 2.80           | 0.08          | Cbfl          |
| gmMc     | 5.72               | NA                | NA             | NA            | Cbfl          |
| GmmgC    | 7.54               | 3.92              | NA             | 4.15          | Cbfl          |
| gn       | 3.37               | 1.15              | NA             | 1.65          | Cbfl          |
| GN       | 1.26               | 0.08              | 2.47           | 0.09          | Cbfl          |
| gNC      | 6.22               | 1.90              | NA             | 2.04          | Cbfl          |
| gng      | 2.04               | 0.07              | 3.04           | 0.09          | Cbfl          |
| gNGGNn   | 1.04               | 0.10              | 1.96           | 0.07          | Cbfl          |
| gNM      | 1.59               | 0.08              | 3.98           | 0.06          | Cbfl          |
| GNm      | 1.20               | 0.08              | 2.34           | 0.08          | Cbfl          |
| GNM      | 1.74               | 0.09              | 2.72           | 0.08          | Cbfl          |
| gnmG     | 6.21               | NA                | NA             | NA            | Cbfl          |
| GNmN     | 3.98               | NA                | NA             | NA            | Cbfl          |
| GnnCn    | 2.79               | 1.57              | 3.42           | 1.87          | Cbfl          |
| GnnMCn   | 4.18               | 1.95              | NA             | 2.50          | Cbfl          |
| m        | 1.04               | 0.09              | 1.30           | 0.06          | Cbfl          |
| M        | 1.25               | 0.13              | 1.42           | 0.12          | Cbfl          |
| mc       | 5.38               | 2.28              | NA             | 2.61          | Cbfl          |
| mC       | 6.72               | 2.27              | 3.85           | 2.52          | Cbfl          |
| MCG      | 5.94               | 2.04              | NA             | 2.32          | Cbfl          |

| Promoter | Glucose Expression | Glucose Occupancy | AAS Expression | AAS Occupancy | Tagged Factor |
|----------|--------------------|-------------------|----------------|---------------|---------------|
| Mcggg    | 3.90               | 1.43              | NA             | 1.82          | Cbfl          |
| mcm      | 8.11               | 2.08              | NA             | 2.31          | Cbfl          |
| mCm      | 5.66               | 2.36              | NA             | 2.64          | Cbfl          |
| MCMgMg   | 5.41               | 1.93              | NA             | 2.18          | Cbfl          |
| mcn      | 4.14               | 1.83              | NA             | 2.32          | Cbfl          |
| MCN      | 5.11               | 1.88              | NA             | 2.12          | Cbfl          |
| MCnCn    | 1.91               | 0.04              | 2.59           | 0.04          | Cbfl          |
| MCnn     | 3.12               | 1.68              | 4.10           | 2.13          | Cbfl          |
| MCNN     | 1.18               | 0.05              | 1.92           | 0.03          | Cbfl          |
| mG       | 6.85               | 1.96              | NA             | 2.14          | Cbfl          |
| Mg       | 2.25               | 0.27              | 3.86           | 0.13          | Cbfl          |
| MG       | 2.14               | 0.16              | 3.89           | 0.13          | Cbfl          |
| mgc      | 6.52               | 2.22              | NA             | 2.44          | Cbfl          |
| Mgc      | 5.96               | 2.30              | NA             | 2.42          | Cbfl          |
| MGCG     | 4.58               | 3.22              | NA             | 3.27          | Cbfl          |
| MgcM     | 4.09               | 0.15              | NA             | 0.65          | Cbfl          |
| MGCn     | 5.74               | 1.69              | NA             | 2.04          | Cbfl          |
| MgG      | 2.13               | 0.13              | NA             | 0.10          | Cbfl          |
| MGg      | 2.23               | 0.10              | 4.27           | 0.11          | Cbfl          |
| MggCNM   | 4.83               | NA                | NA             | NA            | Cbfl          |
| mggN     | 1.43               | 0.09              | 2.81           | 0.09          | Cbfl          |
| MGGNm    | 2.14               | NA                | NA             | NA            | Cbfl          |
| MGm      | 3.15               | NA                | 5.13           | NA            | Cbfl          |

| Promoter | Glucose Expression | Glucose Occupancy | AAS Expression | AAS Occupancy | Tagged Factor |
|----------|--------------------|-------------------|----------------|---------------|---------------|
| mGmC     | 3.54               | 0.06              | NA             | 0.05          | Cbfl          |
| MGmCc    | 2.86               | 0.08              | NA             | 0.08          | Cbfl          |
| MGmM     | 5.39               | 0.13              | NA             | 0.11          | Cbfl          |
| mgMNc    | 2.94               | 0.06              | NA             | 0.01          | Cbfl          |
| mGn      | 0.88               | 0.04              | 3.41           | 0.03          | Cbfl          |
| mGNc     | 5.60               | 2.20              | NA             | 2.37          | Cbfl          |
| MGnGC    | 5.61               | 1.99              | NA             | 2.27          | Cbfl          |
| mGNNG    | 1.17               | 0.09              | 2.90           | 0.09          | Cbfl          |
| mm       | 3.70               | 0.09              | 4.09           | 0.08          | Cbfl          |
| mM       | 3.34               | 0.20              | 4.94           | NA            | Cbfl          |
| MM       | 3.65               | 0.10              | 4.51           | 0.09          | Cbfl          |
| MMgc     | 4.43               | 0.06              | NA             | 0.04          | Cbfl          |
| MMGN     | 1.56               | 0.09              | 3.79           | 0.10          | Cbfl          |
| mmm      | 4.32               | 0.10              | NA             | 0.10          | Cbfl          |
| mmn      | 7.73               | 2.35              | NA             | 2.70          | Cbfl          |
| MmnCMN   | 7.32               | 2.06              | NA             | 2.05          | Cbfl          |
| MmNm     | 2.78               | 0.06              | 4.63           | NA            | Cbfl          |
| mn       | 0.63               | 0.08              | 0.87           | 0.07          | Cbfl          |
| Mn       | 0.76               | 0.09              | 0.87           | 0.07          | Cbfl          |
| MN       | 0.95               | 0.30              | 1.25           | 0.21          | Cbfl          |
| MNcg     | 3.92               | 4.41              | NA             | 5.25          | Cbfl          |
| mnCn     | 1.47               | 0.03              | 2.83           | 0.04          | Cbfl          |
| MnG      | 0.80               | 0.06              | 1.33           | 0.08          | Cbfl          |

| Promoter | Glucose Expression | Glucose Occupancy | AAS Expression | AAS Occupancy | Tagged Factor |
|----------|--------------------|-------------------|----------------|---------------|---------------|
| MngG     | 1.20               | 0.04              | 5.00           | 0.03          | Cbfl          |
| mNGmm    | 3.31               | 0.09              | NA             | 0.11          | Cbfl          |
| MNm      | 1.60               | NA                | 2.22           | NA            | Cbfl          |
| MnMG     | 1.97               | 0.49              | 4.33           | 0.19          | Cbfl          |
| MNMG     | 1.32               | 0.12              | NA             | 0.10          | Cbfl          |
| mnMGG    | 2.20               | 0.10              | 4.10           | 0.09          | Cbfl          |
| mNnc     | 1.48               | 0.04              | 2.18           | 0.03          | Cbfl          |
| MNnc     | 4.00               | 2.11              | 4.55           | 2.34          | Cbfl          |
| mnng     | 0.79               | 0.07              | 1.36           | 0.07          | Cbfl          |
| MnNgnG   | 1.02               | 0.08              | 1.61           | 0.09          | Cbfl          |
| n        | 0.61               | 0.11              | 0.59           | 0.06          | Cbfl          |
| N        | 0.84               | 0.10              | 0.89           | 0.07          | Cbfl          |
| nc       | 4.39               | 2.01              | 3.98           | 2.22          | Cbfl          |
| nC       | 4.63               | 1.90              | 3.96           | 2.14          | Cbfl          |
| Nc       | 2.36               | 0.19              | NA             | 0.31          | Cbfl          |
| NC       | 1.96               | 0.47              | 2.13           | 0.63          | Cbfl          |
| NcG      | 5.31               | 1.81              | NA             | 2.08          | Cbfl          |
| NCg      | 5.77               | 1.75              | NA             | 1.92          | Cbfl          |
| NcGnGN   | 1.43               | 0.69              | 4.07           | 1.11          | Cbfl          |
| ncGNNm   | 1.36               | 0.72              | 3.43           | 0.99          | Cbfl          |
| ncM      | 4.80               | 1.88              | NA             | 2.30          | Cbfl          |
| Ncm      | 5.31               | 1.81              | 7.46           | 2.17          | Cbfl          |
| NCmn     | 1.53               | NA                | 4.29           | NA            | Cbfl          |

| Promoter | Glucose Expression | Glucose Occupancy | AAS Expression | AAS Occupancy | Tagged Factor |
|----------|--------------------|-------------------|----------------|---------------|---------------|
| nCmnGm   | 5.59               | 1.14              | NA             | 2.16          | Cbfl          |
| ncN      | 3.29               | 5.89              | 3.67           | 9.60          | Cbfl          |
| NCngG    | 2.19               | 1.13              | 4.98           | 1.51          | Cbfl          |
| nCnGm    | 3.22               | 1.08              | 6.55           | 1.77          | Cbfl          |
| nCNGNG   | 0.86               | 0.03              | 4.05           | 0.04          | Cbfl          |
| nCnm     | 3.98               | 1.42              | 5.49           | 1.87          | Cbfl          |
| nCNMCn   | 6.45               | 3.89              | NA             | 4.19          | Cbfl          |
| ng       | 1.12               | 0.08              | 2.79           | 0.07          | Cbfl          |
| nG       | 1.14               | 0.08              | 2.66           | 0.07          | Cbfl          |
| Ng       | 1.52               | 0.11              | 3.01           | 0.11          | Cbfl          |
| NG       | 1.21               | 0.16              | 2.63           | 0.21          | Cbfl          |
| ngc      | 5.78               | 2.02              | 8.40           | 2.15          | Cbfl          |
| NGc      | 5.42               | 2.18              | NA             | 2.50          | Cbfl          |
| NgCgg    | 5.14               | NA                | NA             | NA            | Cbfl          |
| nGcM     | 2.89               | 0.05              | NA             | 0.05          | Cbfl          |
| nGcNm    | 4.86               | 1.20              | NA             | 2.00          | Cbfl          |
| ngg      | 1.34               | 0.05              | 4.43           | 0.03          | Cbfl          |
| Ngg      | 1.52               | 0.16              | 2.64           | 0.18          | Cbfl          |
| nGgCNn   | 1.13               | 0.07              | 3.39           | 0.03          | Cbfl          |
| ngGm     | 6.60               | 0.09              | NA             | 0.07          | Cbfl          |
| ngM      | 1.56               | 0.09              | 3.43           | 0.08          | Cbfl          |
| nGm      | 1.38               | 0.08              | 2.83           | 0.09          | Cbfl          |
| nGMGMC   | 7.00               | 2.46              | NA             | 2.88          | Cbfl          |

| Promoter | Glucose Expression | Glucose Occupancy | AAS Expression | AAS Occupancy | Tagged Factor |
|----------|--------------------|-------------------|----------------|---------------|---------------|
| NGn      | 0.69               | NA                | 1.30           | NA            | Cbfl          |
| NGnc     | 7.09               | NA                | NA             | NA            | Cbfl          |
| NgNGG    | 1.26               | 0.08              | 4.15           | 0.08          | Cbfl          |
| nm       | 0.83               | 0.11              | 1.10           | 0.11          | Cbfl          |
| Nm       | 0.96               | 0.08              | 1.20           | 0.08          | Cbfl          |
| NM       | 1.51               | 0.14              | NA             | 0.12          | Cbfl          |
| nMC      | 6.31               | 2.15              | 8.06           | 2.36          | Cbfl          |
| nMcm     | 6.16               | 2.25              | NA             | 2.71          | Cbfl          |
| nmg      | 1.37               | 0.09              | 2.44           | 0.11          | Cbfl          |
| nMG      | 1.23               | 0.03              | 5.17           | 0.03          | Cbfl          |
| nMgm     | 1.83               | 0.09              | 2.99           | 0.09          | Cbfl          |
| nmGN     | 0.92               | 0.16              | 1.46           | 0.50          | Cbfl          |
| nmM      | 4.04               | 0.06              | NA             | 0.04          | Cbfl          |
| nMm      | 2.57               | 0.09              | 3.54           | 0.09          | Cbfl          |
| NMM      | 5.12               | 1.62              | NA             | 1.70          | Cbfl          |
| NMMgn    | 4.82               | NA                | NA             | NA            | Cbfl          |
| nmn      | 0.49               | 0.07              | 0.58           | 0.07          | Cbfl          |
| Nmn      | 8.41               | NA                | NA             | NA            | Cbfl          |
| nmnM     | 1.38               | 0.11              | 2.08           | 0.06          | Cbfl          |
| nN       | 0.63               | 0.42              | 0.69           | 0.38          | Cbfl          |
| NN       | 0.70               | 0.08              | 0.98           | 0.07          | Cbfl          |
| nnC      | 3.98               | 1.95              | 4.41           | 2.14          | Cbfl          |
| nNC      | 9.86               | 2.60              | 6.35           | 2.80          | Cbfl          |



| Promoter | Glucose Expression | Glucose Occupancy | AAS Expression | AAS Occupancy | Tagged Factor |
|----------|--------------------|-------------------|----------------|---------------|---------------|
| NNc      | 4.12               | 2.11              | 3.88           | 2.47          | Cbfl          |
| NNC      | 4.29               | 2.03              | 3.64           | 2.15          | Cbfl          |
| NNcc     | 6.53               | 4.81              | NA             | 4.59          | Cbfl          |
| NncgN    | 3.22               | 0.98              | 5.88           | 1.51          | Cbfl          |
| NNCN     | 3.42               | 1.71              | 3.25           | 2.01          | Cbfl          |
| NNG      | 1.21               | 0.13              | 2.46           | 0.10          | Cbfl          |
| Nngc     | 4.16               | 2.13              | NA             | 2.40          | Cbfl          |
| nnGGg    | 1.61               | 0.13              | 4.91           | 0.15          | Cbfl          |
| NnM      | 0.86               | 0.08              | 1.08           | 0.06          | Cbfl          |
| NNm      | 0.71               | 0.07              | 0.86           | 0.07          | Cbfl          |
| NNn      | 0.38               | NA                | 0.39           | 0.31          | Cbfl          |
| Basal    | NA                 | 0.17              | 0.98           | 0.07          | Cbfl          |
| cc       | NA                 | 4.50              | NA             | 4.33          | Cbfl          |
| CC       | NA                 | 4.89              | NA             | 4.51          | Cbfl          |
| Cccgen   | NA                 | 8.11              | NA             | 7.22          | Cbfl          |
| CccMM    | NA                 | 6.04              | NA             | 5.92          | Cbfl          |
| ccm      | NA                 | 4.28              | NA             | 4.41          | Cbfl          |
| ccNgc    | NA                 | 6.63              | NA             | 6.51          | Cbfl          |
| ccnGM    | NA                 | 3.85              | 1.38           | 3.63          | Cbfl          |
| cGcGmm   | NA                 | 4.65              | NA             | 4.56          | Cbfl          |
| cgcM     | NA                 | 4.40              | NA             | 4.21          | Cbfl          |
| cGmCCg   | NA                 | 6.25              | NA             | 5.44          | Cbfl          |
| cM       | NA                 | 5.70              | NA             | 6.34          | Cbfl          |

| Promoter | Glucose Expression | Glucose Occupancy | AAS Expression | AAS Occupancy | Tagged Factor |
|----------|--------------------|-------------------|----------------|---------------|---------------|
| CMCGCM   | NA                 | 7.28              | NA             | 8.04          | Cbfl          |
| CMCm     | NA                 | 4.79              | NA             | 4.82          | Cbfl          |
| CMCn     | NA                 | 4.47              | NA             | 4.52          | Cbfl          |
| cMgM     | NA                 | 2.10              | NA             | 2.47          | Cbfl          |
| CMMm     | NA                 | 0.09              | NA             | 0.05          | Cbfl          |
| cmNc     | NA                 | 4.51              | NA             | 4.80          | Cbfl          |
| cnCC     | NA                 | 7.20              | NA             | 9.34          | Cbfl          |
| cncg     | NA                 | 3.92              | NA             | 4.17          | Cbfl          |
| cNcG     | NA                 | 4.17              | NA             | 4.32          | Cbfl          |
| CNCN     | NA                 | 4.34              | NA             | 4.39          | Cbfl          |
| CNm      | NA                 | 2.19              | NA             | 2.20          | Cbfl          |
| GC       | NA                 | 5.65              | NA             | 5.64          | Cbfl          |
| GcC      | NA                 | 4.38              | NA             | 4.51          | Cbfl          |
| gcgcn    | NA                 | 4.11              | NA             | 4.10          | Cbfl          |
| gCGGN    | NA                 | 0.94              | NA             | 1.30          | Cbfl          |
| gcgmGn   | NA                 | 1.16              | NA             | 1.62          | Cbfl          |
| GCM      | NA                 | 7.04              | NA             | 6.61          | Cbfl          |
| GcMNc    | NA                 | 5.01              | NA             | 4.85          | Cbfl          |
| gCnGc    | NA                 | 4.41              | NA             | 4.55          | Cbfl          |
| gCNnn    | NA                 | 0.93              | NA             | 1.42          | Cbfl          |
| ggCMc    | NA                 | 4.91              | NA             | 4.62          | Cbfl          |
| gGMGN    | NA                 | 1.93              | NA             | 3.63          | Cbfl          |
| gGncem   | NA                 | 4.67              | NA             | 4.29          | Cbfl          |

| Promoter | Glucose Expression | Glucose Occupancy | AAS Expression | AAS Occupancy | Tagged Factor |
|----------|--------------------|-------------------|----------------|---------------|---------------|
| GMCn     | NA                 | 2.17              | NA             | 1.95          | Cbfl          |
| GmGcCN   | NA                 | 4.47              | NA             | 4.64          | Cbfl          |
| gmN      | NA                 | 0.95              | NA             | 2.07          | Cbfl          |
| GmN      | NA                 | 2.01              | NA             | 2.03          | Cbfl          |
| GNCC     | NA                 | 6.89              | NA             | 6.77          | Cbfl          |
| GNNc     | NA                 | 2.14              | NA             | 2.23          | Cbfl          |
| mcC      | NA                 | 4.83              | NA             | 4.94          | Cbfl          |
| MCcG     | NA                 | 3.39              | NA             | 3.26          | Cbfl          |
| MCCG     | NA                 | 4.56              | NA             | 4.08          | Cbfl          |
| MccN     | NA                 | 4.52              | NA             | 4.34          | Cbfl          |
| McG      | NA                 | 1.87              | NA             | 2.34          | Cbfl          |
| mCmC     | NA                 | 5.48              | NA             | 5.53          | Cbfl          |
| MCMC     | NA                 | 4.74              | NA             | 4.58          | Cbfl          |
| MCMccg   | NA                 | 6.75              | NA             | 6.18          | Cbfl          |
| MCMMNc   | NA                 | 5.30              | NA             | 5.23          | Cbfl          |
| MGc      | NA                 | 7.50              | NA             | 7.33          | Cbfl          |
| MGCCcN   | NA                 | 6.50              | NA             | 5.65          | Cbfl          |
| MGccnc   | NA                 | 6.80              | NA             | 6.32          | Cbfl          |
| mgcmC    | NA                 | 5.07              | NA             | 5.06          | Cbfl          |
| mGCN     | NA                 | 7.95              | NA             | 7.21          | Cbfl          |
| mGggC    | NA                 | 2.09              | NA             | 2.36          | Cbfl          |
| mGMn     | NA                 | 0.07              | NA             | 0.11          | Cbfl          |
| MgN      | NA                 | 8.37              | NA             | 5.80          | Cbfl          |

| Promoter | Glucose Expression | Glucose Occupancy | AAS Expression | AAS Occupancy | Tagged Factor |
|----------|--------------------|-------------------|----------------|---------------|---------------|
| MGnnNM   | NA                 | 0.09              | NA             | 0.08          | Cbfl          |
| Mm       | NA                 | 0.46              | NA             | NA            | Cbfl          |
| MMgC     | NA                 | 0.07              | NA             | 0.06          | Cbfl          |
| mmnmC    | NA                 | 2.58              | NA             | 2.77          | Cbfl          |
| MnccMM   | NA                 | 4.79              | NA             | 4.55          | Cbfl          |
| MNgMmn   | NA                 | 0.08              | NA             | 0.07          | Cbfl          |
| mNm      | NA                 | 0.17              | NA             | 0.16          | Cbfl          |
| mmnC     | NA                 | 2.76              | NA             | 2.95          | Cbfl          |
| MNmmCN   | NA                 | 2.52              | NA             | 2.44          | Cbfl          |
| ncc      | NA                 | 4.47              | NA             | 4.43          | Cbfl          |
| nCCGnm   | NA                 | 4.15              | NA             | 3.93          | Cbfl          |
| NCcmg    | NA                 | 4.26              | NA             | 4.28          | Cbfl          |
| ncg      | NA                 | 1.38              | NA             | 1.68          | Cbfl          |
| NCgGg    | NA                 | 1.55              | NA             | 1.76          | Cbfl          |
| ncGgm    | NA                 | 1.10              | NA             | 1.61          | Cbfl          |
| ncGmm    | NA                 | 1.83              | NA             | 2.07          | Cbfl          |
| ngC      | NA                 | 2.56              | NA             | 2.85          | Cbfl          |
| ngCc     | NA                 | 4.75              | NA             | 4.60          | Cbfl          |
| Ngm      | NA                 | 0.06              | NA             | 0.09          | Cbfl          |
| nGMC     | NA                 | 7.20              | NA             | 8.63          | Cbfl          |
| NgNm     | NA                 | 3.94              | NA             | 5.05          | Cbfl          |
| NMcc     | NA                 | 4.73              | NA             | 4.83          | Cbfl          |
| nmCGC    | NA                 | 10.81             | NA             | 10.28         | Cbfl          |

| Promoter | Glucose Expression | Glucose Occupancy | AAS Expression | AAS Occupancy | Tagged Factor |
|----------|--------------------|-------------------|----------------|---------------|---------------|
| Nmg      | NA                 | 4.27              | NA             | 5.18          | Cbf1          |
| nmgG     | NA                 | 0.20              | NA             | 0.14          | Cbf1          |
| NmmgMC   | NA                 | 2.64              | NA             | 2.88          | Cbf1          |
| nMNMm    | NA                 | 0.10              | NA             | 0.13          | Cbf1          |
| nn       | NA                 | 0.29              | NA             | 0.10          | Cbf1          |
| Nn       | NA                 | 0.27              | NA             | NA            | Cbf1          |
| NNgCgM   | NA                 | 4.56              | NA             | 4.41          | Cbf1          |
| NNGn     | NA                 | 0.10              | NA             | 0.07          | Cbf1          |
| cCCC     | NA                 | NA                | NA             | 11.18         | Cbf1          |
| mGCM     | NA                 | NA                | NA             | 4.44          | Cbf1          |
| NccmN    | NA                 | NA                | NA             | 4.73          | Cbf1          |
| NGccmN   | NA                 | NA                | NA             | 6.80          | Cbf1          |
| c        | 2.18               | 0.86              | 1.94           | 0.15          | Gcn4          |
| C        | 2.15               | 0.85              | 1.78           | 0.20          | Gcn4          |
| cc       | 2.67               | 0.69              | 2.21           | 0.19          | Gcn4          |
| CC       | 2.30               | 1.05              | 2.19           | 0.19          | Gcn4          |
| Ccc      | 3.02               | NA                | 2.01           | NA            | Gcn4          |
| Cccgen   | 2.72               | NA                | 4.67           | 1.80          | Gcn4          |
| cCcNC    | 1.13               | NA                | NA             | NA            | Gcn4          |
| CcG      | 3.07               | NA                | NA             | 3.11          | Gcn4          |
| CCG      | 2.20               | NA                | NA             | 10.36         | Gcn4          |
| ccgC     | 2.37               | NA                | NA             | NA            | Gcn4          |
| Ccm      | 3.10               | 0.73              | 4.40           | 0.17          | Gcn4          |

| Promoter | Glucose Expression | Glucose Occupancy | AAS Expression | AAS Occupancy | Tagged Factor |
|----------|--------------------|-------------------|----------------|---------------|---------------|
| ccN      | 2.59               | 0.65              | 2.47           | 0.07          | Gcn4          |
| cCN      | 2.45               | 0.91              | 1.69           | 0.14          | Gcn4          |
| cCnGGn   | 0.59               | NA                | NA             | 4.11          | Gcn4          |
| cCNm     | 2.83               | 0.78              | 5.00           | 0.11          | Gcn4          |
| cg       | 1.05               | NA                | NA             | NA            | Gcn4          |
| Cg       | 2.52               | 1.40              | NA             | 2.27          | Gcn4          |
| Cgcm     | 2.78               | 1.80              | NA             | 2.16          | Gcn4          |
| cGmCCg   | 2.47               | 2.44              | NA             | 6.14          | Gcn4          |
| cGN      | 1.30               | 1.02              | 5.05           | 1.48          | Gcn4          |
| cGnmM    | 4.28               | 1.21              | NA             | 2.29          | Gcn4          |
| cm       | 2.79               | 0.63              | 3.99           | 0.16          | Gcn4          |
| cM       | 0.79               | 3.20              | 5.60           | 6.27          | Gcn4          |
| CM       | 3.16               | 0.75              | NA             | 0.39          | Gcn4          |
| CMCGCM   | 2.74               | 2.15              | NA             | 3.13          | Gcn4          |
| CMCm     | 4.48               | 0.54              | NA             | 0.13          | Gcn4          |
| CMCn     | 2.47               | 0.64              | 3.92           | 0.11          | Gcn4          |
| cmG      | 2.25               | 1.27              | NA             | 2.39          | Gcn4          |
| cmM      | 5.79               | 0.70              | NA             | 0.16          | Gcn4          |
| cmn      | 1.69               | 0.57              | 3.45           | 0.13          | Gcn4          |
| cmNc     | 2.39               | 0.71              | NA             | 0.16          | Gcn4          |
| cmnmc    | 3.37               | 0.42              | 5.17           | 0.10          | Gcn4          |
| CMNn     | 3.58               | NA                | NA             | NA            | Gcn4          |
| cn       | 1.12               | 0.66              | NA             | 0.08          | Gcn4          |

| Promoter | Glucose Expression | Glucose Occupancy | AAS Expression | AAS Occupancy | Tagged Factor |
|----------|--------------------|-------------------|----------------|---------------|---------------|
| cN       | 2.45               | 0.67              | 3.03           | 0.13          | Gcn4          |
| CN       | 1.89               | 0.87              | 1.78           | 0.12          | Gcn4          |
| CnC      | 5.70               | NA                | NA             | NA            | Gcn4          |
| cNcG     | 2.90               | 2.43              | NA             | 2.21          | Gcn4          |
| Cncgm    | 2.65               | NA                | NA             | 1.94          | Gcn4          |
| cng      | 1.38               | 0.88              | 5.13           | 1.19          | Gcn4          |
| Cng      | 1.26               | 1.02              | NA             | 1.62          | Gcn4          |
| CnG      | 1.26               | 1.04              | 5.21           | 1.43          | Gcn4          |
| cngCnG   | 1.22               | 0.85              | NA             | 4.29          | Gcn4          |
| cnMc     | 3.12               | 0.43              | 3.40           | 0.12          | Gcn4          |
| CNMgg    | 1.05               | 1.08              | NA             | 5.48          | Gcn4          |
| cnncMN   | 2.19               | 0.55              | 4.30           | 0.10          | Gcn4          |
| g        | 1.15               | 1.10              | 4.02           | 1.49          | Gcn4          |
| G        | 1.18               | 1.24              | 3.79           | 1.67          | Gcn4          |
| Gc       | 2.15               | 1.21              | 4.57           | 2.15          | Gcn4          |
| GC       | 2.74               | 2.64              | NA             | 9.48          | Gcn4          |
| GcC      | 2.56               | 1.32              | 4.32           | 2.01          | Gcn4          |
| gcgCM    | 2.75               | 1.73              | NA             | 6.28          | Gcn4          |
| gcgcN    | 1.97               | 1.16              | NA             | 6.67          | Gcn4          |
| GcgG     | 1.25               | 4.48              | NA             | 14.26         | Gcn4          |
| GCgggn   | 1.03               | NA                | NA             | 14.77         | Gcn4          |
| gCM      | 3.38               | 0.79              | NA             | 2.15          | Gcn4          |
| Gcm      | 2.79               | 0.95              | NA             | 2.14          | Gcn4          |

| Promoter | Glucose Expression | Glucose Occupancy | AAS Expression | AAS Occupancy | Tagged Factor |
|----------|--------------------|-------------------|----------------|---------------|---------------|
| GCm      | 2.49               | 0.75              | NA             | 2.15          | Gcn4          |
| GCM      | 3.07               | NA                | NA             | NA            | Gcn4          |
| Gcn      | 1.62               | 0.89              | 3.98           | 1.42          | Gcn4          |
| gCnGc    | 2.59               | 1.53              | NA             | 5.09          | Gcn4          |
| gCNnn    | 0.37               | 0.70              | 1.29           | 0.50          | Gcn4          |
| Gg       | 0.93               | NA                | 5.05           | 10.26         | Gcn4          |
| GG       | 0.89               | 1.35              | 5.43           | 5.37          | Gcn4          |
| gGCn     | 1.12               | 3.13              | NA             | 7.13          | Gcn4          |
| GggnG    | 0.71               | 1.17              | NA             | 11.69         | Gcn4          |
| gGm      | 1.68               | 2.32              | NA             | 4.54          | Gcn4          |
| gGMGN    | 1.86               | NA                | NA             | 14.85         | Gcn4          |
| ggMMM    | 5.08               | 1.98              | NA             | 10.28         | Gcn4          |
| GGmn     | 0.52               | 0.95              | 4.41           | 3.12          | Gcn4          |
| gM       | 1.71               | 0.88              | 5.07           | 1.29          | Gcn4          |
| Gm       | 1.70               | 1.17              | 5.53           | 1.12          | Gcn4          |
| GM       | 1.58               | 1.27              | NA             | 1.49          | Gcn4          |
| gmc      | 2.81               | 1.06              | NA             | 2.72          | Gcn4          |
| gmC      | 2.64               | 0.78              | NA             | 2.47          | Gcn4          |
| GMC      | 2.62               | 1.13              | NA             | 2.49          | Gcn4          |
| gMG      | 1.60               | NA                | NA             | NA            | Gcn4          |
| GmGg     | 1.73               | 1.61              | NA             | 7.10          | Gcn4          |
| Gmgm     | 1.94               | NA                | NA             | NA            | Gcn4          |
| GmgmGg   | 1.20               | NA                | NA             | NA            | Gcn4          |



| Promoter | Glucose Expression | Glucose Occupancy | AAS Expression | AAS Occupancy | Tagged Factor |
|----------|--------------------|-------------------|----------------|---------------|---------------|
| gMgn     | 0.81               | 0.86              | 4.20           | 2.44          | Gcn4          |
| gMGn     | 0.85               | NA                | 4.19           | 3.62          | Gcn4          |
| GmM      | 5.21               | NA                | NA             | NA            | Gcn4          |
| GMMg     | 2.24               | NA                | NA             | NA            | Gcn4          |
| GN       | 0.95               | 0.90              | 3.01           | 0.64          | Gcn4          |
| gNC      | 2.20               | 0.72              | 3.87           | 1.04          | Gcn4          |
| gNM      | 1.13               | 0.76              | 3.43           | 0.65          | Gcn4          |
| GNM      | 1.24               | 0.66              | 3.82           | 0.54          | Gcn4          |
| GnMm     | 3.92               | NA                | NA             | 1.21          | Gcn4          |
| Gnn      | 0.34               | 0.66              | 0.88           | 0.27          | Gcn4          |
| GNNc     | 1.68               | 0.79              | 2.71           | 0.78          | Gcn4          |
| m        | 1.22               | 0.92              | 1.51           | 0.16          | Gcn4          |
| M        | 1.49               | 0.95              | 1.68           | 0.17          | Gcn4          |
| mc       | 2.44               | 0.61              | 3.64           | 0.14          | Gcn4          |
| McG      | 2.64               | 1.28              | NA             | 2.06          | Gcn4          |
| mCGC     | 2.89               | 1.82              | NA             | 2.18          | Gcn4          |
| Mcggg    | 1.01               | 1.68              | NA             | 12.71         | Gcn4          |
| mcgm     | 3.76               | 1.46              | NA             | 2.51          | Gcn4          |
| mCm      | 4.78               | 0.45              | NA             | 0.17          | Gcn4          |
| Mcm      | 4.29               | NA                | NA             | NA            | Gcn4          |
| mCmC     | 3.68               | 0.56              | 4.37           | 0.15          | Gcn4          |
| Mcmgn    | 1.89               | NA                | NA             | 2.51          | Gcn4          |
| MCMMNc   | 4.09               | 1.15              | NA             | 0.13          | Gcn4          |

| Promoter | Glucose Expression | Glucose Occupancy | AAS Expression | AAS Occupancy | Tagged Factor |
|----------|--------------------|-------------------|----------------|---------------|---------------|
| MCN      | 2.09               | 0.63              | 2.77           | 0.13          | Gcn4          |
| McNcnm   | 2.88               | NA                | NA             | NA            | Gcn4          |
| MCnn     | 1.83               | 0.76              | 1.81           | 0.16          | Gcn4          |
| mg       | 2.01               | NA                | NA             | NA            | Gcn4          |
| mG       | 1.43               | 1.08              | 4.66           | 3.83          | Gcn4          |
| Mg       | 1.46               | 0.91              | 4.73           | 1.20          | Gcn4          |
| MG       | 1.71               | 1.06              | 5.28           | 1.07          | Gcn4          |
| mgc      | 2.59               | 1.55              | NA             | 2.42          | Gcn4          |
| Mgc      | 2.95               | 1.37              | NA             | 2.26          | Gcn4          |
| MGc      | 3.31               | 0.96              | NA             | 2.22          | Gcn4          |
| mgCCnc   | 2.56               | 0.99              | 4.25           | 2.32          | Gcn4          |
| mgcmC    | 3.46               | 1.41              | NA             | 3.55          | Gcn4          |
| MGg      | 1.06               | 1.03              | NA             | 3.30          | Gcn4          |
| MggCc    | 1.78               | NA                | NA             | NA            | Gcn4          |
| MGGcG    | 3.95               | 2.51              | NA             | 19.41         | Gcn4          |
| MggCNM   | 1.95               | NA                | NA             | NA            | Gcn4          |
| mggN     | 0.58               | 0.91              | 3.24           | 1.91          | Gcn4          |
| mgN      | 0.79               | 0.80              | 2.74           | 0.66          | Gcn4          |
| MGnGC    | 1.68               | 1.26              | NA             | 5.93          | Gcn4          |
| mm       | 4.66               | 0.75              | NA             | 0.18          | Gcn4          |
| MM       | 4.52               | 1.06              | NA             | 0.16          | Gcn4          |
| mMccCG   | 2.82               | NA                | NA             | 2.78          | Gcn4          |
| MMGg     | 0.68               | 1.85              | NA             | 10.92         | Gcn4          |

| Promoter | Glucose Expression | Glucose Occupancy | AAS Expression | AAS Occupancy | Tagged Factor |
|----------|--------------------|-------------------|----------------|---------------|---------------|
| MMgmN    | 2.44               | 0.99              | NA             | 1.40          | Gcn4          |
| mmn      | 2.80               | 0.62              | 5.00           | 0.12          | Gcn4          |
| MMNcg    | 1.18               | NA                | NA             | NA            | Gcn4          |
| mmnmC    | 4.58               | 1.01              | NA             | 0.20          | Gcn4          |
| Mn       | 0.67               | 0.72              | 1.04           | 0.14          | Gcn4          |
| MN       | 1.07               | 0.78              | 1.29           | 0.20          | Gcn4          |
| mNC      | 2.20               | 0.82              | 3.02           | 0.36          | Gcn4          |
| Mng      | 1.67               | NA                | NA             | 4.52          | Gcn4          |
| MNm      | 2.16               | NA                | 3.44           | NA            | Gcn4          |
| mNmC     | 3.17               | 0.64              | NA             | 0.09          | Gcn4          |
| Mnmg     | 1.13               | 0.45              | NA             | 0.65          | Gcn4          |
| MnMG     | 1.36               | 0.77              | NA             | 1.08          | Gcn4          |
| MNMG     | 1.57               | 0.82              | NA             | 1.01          | Gcn4          |
| mnMGG    | 0.75               | NA                | NA             | 4.43          | Gcn4          |
| MNnc     | 1.87               | 0.81              | 1.68           | 0.15          | Gcn4          |
| mnng     | 1.62               | 0.73              | 1.63           | 0.28          | Gcn4          |
| n        | 0.55               | 0.82              | 0.63           | 0.15          | Gcn4          |
| N        | 0.83               | 0.89              | 0.89           | 0.18          | Gcn4          |
| nc       | 2.02               | 0.67              | 1.79           | 0.14          | Gcn4          |
| nC       | 2.02               | 0.66              | 1.70           | 0.14          | Gcn4          |
| Nc       | 2.04               | 0.54              | 1.67           | 0.14          | Gcn4          |
| ncc      | 2.61               | 0.79              | 2.33           | 0.12          | Gcn4          |
| nCCGnm   | 1.84               | 1.41              | NA             | 2.45          | Gcn4          |

| Promoter | Glucose Expression | Glucose Occupancy | AAS Expression | AAS Occupancy | Tagged Factor |
|----------|--------------------|-------------------|----------------|---------------|---------------|
| ncg      | 1.33               | NA                | 4.22           | NA            | Gcn4          |
| NcG      | 2.30               | 1.26              | NA             | 1.54          | Gcn4          |
| ncGgm    | 1.55               | 1.69              | NA             | 4.72          | Gcn4          |
| nCGm     | 2.89               | 1.16              | NA             | 1.78          | Gcn4          |
| NcGm     | 2.51               | 0.89              | NA             | 1.60          | Gcn4          |
| ncGmm    | 5.22               | 1.58              | NA             | 2.16          | Gcn4          |
| ncm      | 2.33               | 0.70              | 3.11           | 0.13          | Gcn4          |
| Ncm      | 2.61               | 0.67              | 4.48           | 0.23          | Gcn4          |
| ncmN     | 2.00               | NA                | NA             | NA            | Gcn4          |
| nCmnGG   | 0.76               | 0.84              | NA             | 6.15          | Gcn4          |
| ncN      | 1.58               | NA                | 1.46           | NA            | Gcn4          |
| nCnGm    | 1.25               | 1.03              | NA             | 1.98          | Gcn4          |
| nCnm     | 1.85               | 0.79              | 3.00           | 0.14          | Gcn4          |
| nCNMCn   | 1.92               | 0.54              | 2.74           | 0.18          | Gcn4          |
| ng       | 0.56               | 0.86              | 2.48           | 1.08          | Gcn4          |
| Ng       | 0.71               | 1.34              | 3.82           | 1.30          | Gcn4          |
| NG       | 1.00               | 0.81              | 3.08           | 1.22          | Gcn4          |
| ngc      | 2.01               | 1.30              | 4.68           | 1.43          | Gcn4          |
| NGc      | 1.90               | 1.13              | 5.08           | 1.75          | Gcn4          |
| NGC      | 2.21               | 0.99              | 4.89           | 1.42          | Gcn4          |
| ngCMGC   | 2.70               | 1.49              | NA             | 5.86          | Gcn4          |
| NGcNn    | 0.76               | 0.49              | 1.53           | 0.71          | Gcn4          |
| Ngg      | 0.76               | 0.91              | 3.46           | 2.46          | Gcn4          |

| Promoter | Glucose Expression | Glucose Occupancy | AAS Expression | AAS Occupancy | Tagged Factor |
|----------|--------------------|-------------------|----------------|---------------|---------------|
| NGg      | 0.63               | 1.04              | 3.96           | 2.77          | Gcn4          |
| NggGc    | 1.27               | 1.93              | NA             | 11.09         | Gcn4          |
| NgGMCm   | 2.69               | 2.99              | NA             | 10.42         | Gcn4          |
| ngM      | 1.13               | 0.93              | 3.94           | 0.96          | Gcn4          |
| nGm      | 1.32               | 1.02              | 3.85           | 0.73          | Gcn4          |
| nGM      | 1.15               | 0.93              | 4.28           | 0.66          | Gcn4          |
| ngMc     | 2.35               | 1.13              | NA             | 2.07          | Gcn4          |
| nGMC     | 3.00               | NA                | NA             | 7.94          | Gcn4          |
| NgMG     | 0.98               | 0.97              | NA             | 3.52          | Gcn4          |
| ngMm     | 3.65               | 1.00              | NA             | 1.28          | Gcn4          |
| ngMMn    | 1.92               | 0.60              | NA             | 1.20          | Gcn4          |
| NgN      | 0.50               | 0.61              | 1.76           | 0.37          | Gcn4          |
| NgNGG    | 0.55               | 0.71              | 4.33           | 4.32          | Gcn4          |
| nm       | 0.87               | 0.97              | 1.16           | 0.32          | Gcn4          |
| Nm       | 1.20               | 0.83              | 1.37           | 0.22          | Gcn4          |
| NM       | 1.32               | 0.69              | 1.57           | 0.19          | Gcn4          |
| nMC      | 2.47               | 0.81              | 3.75           | 0.16          | Gcn4          |
| NMccNc   | 2.69               | 0.44              | 2.62           | 0.11          | Gcn4          |
| nmCNN    | 1.10               | NA                | 2.08           | NA            | Gcn4          |
| nmg      | 0.72               | 0.80              | 2.79           | 0.66          | Gcn4          |
| Nmg      | 1.03               | 1.18              | 3.51           | 1.33          | Gcn4          |
| nmGN     | 0.52               | NA                | 2.12           | NA            | Gcn4          |
| nmGng    | 0.99               | 0.64              | 3.86           | 1.99          | Gcn4          |

| Promoter | Glucose Expression | Glucose Occupancy | AAS Expression | AAS Occupancy | Tagged Factor |
|----------|--------------------|-------------------|----------------|---------------|---------------|
| nMm      | 3.75               | 0.85              | 3.70           | 0.11          | Gcn4          |
| Nmn      | 2.74               | NA                | NA             | NA            | Gcn4          |
| nmnM     | 1.79               | 0.61              | 3.26           | 0.19          | Gcn4          |
| nn       | 0.36               | 0.77              | 2.26           | 0.14          | Gcn4          |
| nN       | 0.62               | NA                | 0.68           | NA            | Gcn4          |
| Nn       | 0.52               | NA                | 0.68           | NA            | Gcn4          |
| NN       | 1.65               | 0.87              | 0.98           | 0.24          | Gcn4          |
| NNccc    | 2.73               | 0.52              | 2.47           | 0.09          | Gcn4          |
| NNCN     | 1.65               | 0.68              | 1.66           | 0.14          | Gcn4          |
| NNG      | 0.70               | 1.03              | 2.39           | 0.78          | Gcn4          |
| Nngc     | 1.63               | 1.41              | 4.85           | 1.35          | Gcn4          |
| nnGg     | 1.52               | 0.86              | 2.01           | 1.30          | Gcn4          |
| NNGn     | 0.34               | 0.50              | 1.37           | 0.27          | Gcn4          |
| Nnm      | 0.75               | 0.90              | 0.84           | 0.17          | Gcn4          |
| NnmG     | 0.63               | 0.59              | 3.10           | 0.98          | Gcn4          |
| nNN      | 0.65               | NA                | 0.67           | NA            | Gcn4          |
| NNn      | 0.35               | NA                | 0.43           | NA            | Gcn4          |
| cC       | NA                 | 0.71              | NA             | 0.11          | Gcn4          |
| ccMmM    | NA                 | 0.83              | NA             | 0.16          | Gcn4          |
| ccNgc    | NA                 | 2.11              | NA             | 8.01          | Gcn4          |
| CMM      | NA                 | 0.65              | NA             | 0.25          | Gcn4          |
| CNm      | NA                 | 0.97              | NA             | 0.16          | Gcn4          |
| CNMM     | NA                 | 0.53              | NA             | 0.09          | Gcn4          |

| Promoter | Glucose Expression | Glucose Occupancy | AAS Expression | AAS Occupancy | Tagged Factor |
|----------|--------------------|-------------------|----------------|---------------|---------------|
| gCGGNN   | NA                 | 2.19              | NA             | 7.08          | Gcn4          |
| gcgmGn   | NA                 | 1.49              | NA             | 11.32         | Gcn4          |
| GGNmc    | NA                 | 1.07              | NA             | 9.42          | Gcn4          |
| gMcNMM   | NA                 | 1.41              | NA             | 3.48          | Gcn4          |
| GMGmn    | NA                 | 0.88              | NA             | 2.89          | Gcn4          |
| gMM      | NA                 | 1.07              | NA             | 2.64          | Gcn4          |
| gn       | NA                 | 1.56              | NA             | 10.83         | Gcn4          |
| McNg     | NA                 | 1.08              | NA             | 1.57          | Gcn4          |
| MGmM     | NA                 | 1.16              | NA             | 2.46          | Gcn4          |
| MNgMmn   | NA                 | 1.06              | NA             | 1.59          | Gcn4          |
| NCcmG    | NA                 | 1.99              | NA             | 3.06          | Gcn4          |
| nG       | NA                 | 0.93              | NA             | 1.35          | Gcn4          |
| NGCGNG   | NA                 | 1.52              | NA             | 8.35          | Gcn4          |
| nGMGMC   | NA                 | 1.08              | NA             | 6.40          | Gcn4          |
| nGMnCM   | NA                 | 0.68              | NA             | 1.79          | Gcn4          |
| nGnm     | NA                 | 1.54              | NA             | 6.41          | Gcn4          |
| NmmgMC   | NA                 | 1.88              | NA             | 4.83          | Gcn4          |
| NNm      | NA                 | 0.75              | 0.45           | 0.13          | Gcn4          |
| Cn       | NA                 | NA                | NA             | 10.50         | Gcn4          |
| ggn      | NA                 | NA                | NA             | 15.99         | Gcn4          |
| GNgcCc   | NA                 | NA                | NA             | 8.89          | Gcn4          |
| gNGGNn   | NA                 | NA                | NA             | 3.54          | Gcn4          |
| mgmMNm   | NA                 | NA                | NA             | 8.88          | Gcn4          |

| Promoter | Glucose Expression | Glucose Occupancy | AAS Expression | AAS Occupancy | Tagged Factor |
|----------|--------------------|-------------------|----------------|---------------|---------------|
| mmCN     | NA                 | NA                | NA             | 0.44          | Gcn4          |
| MmnNC    | NA                 | NA                | NA             | 0.09          | Gcn4          |
| MNcg     | NA                 | NA                | NA             | 7.37          | Gcn4          |
| mNm      | NA                 | NA                | NA             | 3.12          | Gcn4          |
| NcMM     | NA                 | NA                | NA             | 3.29          | Gcn4          |
| nMNMm    | NA                 | NA                | NA             | 2.66          | Gcn4          |
| NNmCNm   | NA                 | NA                | NA             | 0.08          | Gcn4          |

Synthetic promoters were constructed and expression and occupancy values obtained as detailed in Methods. For promoters, C=Cbf1, fwd; c=Cbf1, rev; G=Gcn4, fwd; g=Gcn4, rev; M=Met31/Met32, fwd; m=Met31/Met32, rev; N=Nrg1, fwd; n=Nrg1, rev, where “fwd” and “rev” refer to the corresponding sequences in Table 3.6. Promoter sequences are listed from most distal to most proximal to the TSS of YFP. In the “Glucose Expression”, “Glucose Occupancy”, “AAS Expression”, and “AAS Occupancy” columns, NA means the value is not available. For Expression columns, this is due to the expression being out of the dynamic range of the cytometer. For Occupancy columns, this is due to their being too few reads in the IN sample to reliably estimate the input distribution.



**Table S4: Overall fits and cross validation results**

| <b>Data Used</b>                         | <b># Parameters</b> | <b>Expression R<sup>2</sup></b> | <b>Occupancy R<sup>2</sup></b> | <b>Cross Validation</b>               |
|------------------------------------------|---------------------|---------------------------------|--------------------------------|---------------------------------------|
| Expression-only                          | 10                  | 0.53                            | 0.36                           | 0.53                                  |
| Occupancy-only                           | 6                   | NA                              | 0.57                           | 0.57                                  |
| Expression and Occupancy, noncompetitive | 15                  | 0.425                           | 0.556                          | 0.42 (expression)<br>0.56(occupancy)  |
| Expression and Occupancy, competitive    | 15                  | 0.431                           | 0.554                          | 0.43 (expression)<br>0.56 (occupancy) |

Expression, occupancy, or expression and occupancy were modeled using the thermodynamic model described in Methods. Each model was fit with the number of parameters indicated (see Table 3.3 for specific parameter details). The model fit with only expression was also used to predict occupancy. The occupancy-only model cannot be used to predict expression since fitting of RNAP interaction terms was not attempted with only occupancy data. When fitting with expression and occupancy, the Gcn4 site was modeled without and with competitive binding (noncompetitive and competitive, respectively). One round of five-fold cross validation was performed on all models as described in the main text methods and the mean R<sup>2</sup> across the validations is reported in the Cross Validation column.

**Table S5: Parameter values from thermodynamic model fitting**

| Fit Type                 | Parameter                                   | Value (+/- 95% CI) |
|--------------------------|---------------------------------------------|--------------------|
| Expression only          | $\Delta G_{\text{Cbf1-DNA,glucose}}$        | 1.32±0.71          |
| Expression only          | $\Delta G_{\text{Met31/Met32-DNA,glucose}}$ | 0.53±0.78          |
| Expression only          | $\Delta G_{\text{Nrg1-DNA,glucose}}$        | 0.41±0.47          |
| Expression only          | $\Delta G_{\text{Cbf1,tagged-RNAP}}$        | -3.84±0.71         |
| Expression only          | $\Delta G_{\text{Cbf1,untagged-RNAP}}$      | -1.14±0.72         |
| Expression only          | $\Delta G_{\text{Gcn4,aas-RNAP}}$           | -1.55±0.32         |
| Expression only          | $\Delta G_{\text{Gcn4,gluc-RNAP}}$          | 0.48±0.33          |
| Expression only          | $\Delta G_{\text{Met31/Met32-RNAP}}$        | -1.11±0.32         |
| Expression only          | $\Delta G_{\text{Nrg1-RNAP}}$               | 5.08±35.7          |
| Expression only          | $\Delta G_{\text{RNAP-DNA}}$                | 0.53±.28           |
| Occupancy only           | $\Delta G_{\text{Cbf1-DNA,glucose}}$        | 3.00±1.86          |
| Occupancy only           | $\Delta G_{\text{Cbf1-DNA,AAS}}$            | 2.91±1.87          |
| Occupancy only           | $\Delta G_{\text{Gcn4-DNA,glucose}}$        | 5.80± 2.17         |
| Occupancy only           | $\Delta G_{\text{Gcn4-DNA,AAS}}$            | 3.06± 1.82         |
| Occupancy only           | $\Delta G_{\text{Gcn4-Gcn4}}$               | -2.62±1.24         |
| Occupancy only           | $\Delta G_{\text{Gcn4-Nrg1}}$               | 1.02±0.65          |
| Expression and Occupancy | $\Delta G_{\text{Cbf1-DNA,glucose}}$        | 4.87*              |
| Expression and Occupancy | $\Delta G_{\text{Gcn4-DNA,glucose}}$        | 2.92*              |
| Expression and Occupancy | $\Delta G_{\text{Met31/Met32-DNA,glucose}}$ | 0.6*               |
| Expression and Occupancy | $\Delta G_{\text{Nrg1-DNA,glucose}}$        | -1.26*             |
| Expression and Occupancy | $\Delta G_{\text{Cbf1-DNA,AAS}}$            | 4.95*              |
| Expression and Occupancy | $\Delta G_{\text{Gcn4-DNA,AAS}}$            | 1.23*              |
| Expression and Occupancy | $\Delta G_{\text{RNAP-DNA}}$                | 1.00*              |

| Fit Type                                 | Parameter                                   | Value (+/- 95% CI) |
|------------------------------------------|---------------------------------------------|--------------------|
| Expression and Occupancy                 | $\Delta G_{\text{Cbf1,tagged-RNAP}}$        | -5.36*             |
| Expression and Occupancy                 | $\Delta G_{\text{Gcn4-RNAP,glucose}}$       | 17.65*             |
| Expression and Occupancy                 | $\Delta G_{\text{Met31/32-RNAP}}$           | -0.42*             |
| Expression and Occupancy                 | $\Delta G_{\text{Nrg1-RNAP}}$               | 0.49*              |
| Expression and Occupancy                 | $\Delta G_{\text{Cbf1,untagged-RNAP}}$      | -3.15*             |
| Expression and Occupancy                 | $\Delta G_{\text{Gcn4-RNAP, AAS}}$          | -0.60*             |
| Expression and Occupancy                 | $\Delta G_{\text{Gcn4-Gcn4}}$               | -2.01*             |
| Expression and Occupancy                 | $\Delta G_{\text{Gcn4-Nrg1}}$               | 3.00*              |
| Expression and Occupancy,<br>Competitive | $\Delta G_{\text{Cbf1-DNA,Glucose}}$        | 5.04±9.89          |
| Expression and Occupancy,<br>Competitive | $\Delta G_{\text{Gcn4,Glucose}}$            | 3.82±1.77          |
| Expression and Occupancy,<br>Competitive | $\Delta G_{\text{Met31/Met32-DNA,glucose}}$ | 0.41±1.30          |
| Expression and Occupancy,<br>Competitive | $\Delta G_{\text{Nrg1-DNA,glucose}}$        | -0.93±1.49         |
| Expression and Occupancy,<br>Competitive | $\Delta G_{\text{Cbf1-DNA,AAS}}$            | 5.13±9.89          |
| Expression and Occupancy,<br>Competitive | $\Delta G_{\text{Gcn4-DNA,AAS}}$            | 0.64±0.34          |
| Expression and Occupancy,<br>Competitive | $\Delta G_{\text{RNAP-DNA}}$                | 0.92±0.22          |
| Expression and Occupancy,<br>Competitive | $\Delta G_{\text{Cbf1,tagged-RNAP}}$        | -5.54±10.0         |
| Expression and Occupancy,<br>Competitive | $\Delta G_{\text{Gcn4-RNAP,glucose}}$       | -0.82±0.34         |
| Expression and Occupancy,<br>Competitive | $\Delta G_{\text{Met31/32-RNAP}}$           | -0.38±0.21         |
| Expression and Occupancy,<br>Competitive | $\Delta G_{\text{Nrg1-RNAP}}$               | 0.52±0.29          |
| Expression and Occupancy,<br>Competitive | $\Delta G_{\text{Cbf1,untagged-RNAP}}$      | -3.3±9.63          |

| Fit Type                              | Parameter                          | Value (+/- 95% CI) |
|---------------------------------------|------------------------------------|--------------------|
| Expression and Occupancy, Competitive | $\Delta G_{\text{Gcn4-RNAP, AAS}}$ | 0.31±0.22          |
| Expression and Occupancy, Competitive | $\Delta G_{\text{Gcn4-Gcn4}}$      | -1.78±0.56         |
| Expression and Occupancy, Competitive | $\Delta G_{\text{Gcn4-Nrg1}}$      | 3.6±12.90          |

Confidence intervals were estimated using the “asymptotic normal distribution for the parameter estimate” method. For more details, see (65).

\* Confidence interval estimates could not be calculated due to numerical instabilities introduced by the  $\Delta G_{\text{Gcn4-RNAP, Glucose}}$  parameter.
